# Supplementary material for: Human sounds and associated tonality disrupting perceived soundscapes in protected natural areas
Source: Research Square preprint supplement (doi:10.21203/rs.3.rs-4940256/v2), 2025-03-21
Supplement: Supplementary file 1 [file 4555b91b5b51313a96b4261f.xlsx]

## Sheet: Tabelle1
Participant_ID	Site_ID	LocationID	SessionID	Participant_Site_ID	Day	Evaluation_point	Q1	Q2	Q3	Q4.1	Q4.2	Q4.3	Q4.4	Q4.5	Q4.6	Q4.1_cod	Q4.2_cod	Q4.3_cod	Q4.4_cod	Q4.5_cod	Q4.6_cod	pleasant	chaotic	vibrant	uneventful	calm	annoying	eventful	monotonous	Q5.1	Q5.2	Q5.3	Q5.4	Q5.5	Q5.6	Q5.7	Q5.8	ISOPleasantness	ISOEventfulness	Q6	Q7	Q8	LZeqL		LZeqMin		LZeq@Min		LZeqMax
1	4	LuiWaterfalls	LuiWaterfalls1	1_4	2023-05-28	LW	1	29	2	1	1	1	1	1	5	1	1	1	1	1	2	4	2	3	3	2	2	3	3	4	2	3	3	2	2	3	3	0.207107	0	4	5	4	77.64	dB(SPL)	76.51	dB(SPL)	36.6	s	79.29
2	4	LuiWaterfalls	LuiWaterfalls1	2_4	2023-05-28	LW	1	46	1	1	1	1	2	1	4	1	1	1	1	1	2	5	2	3	3	5	2	4	4	5	2	3	3	5	2	4	4	0.457107	-0.18934	5	5	5	77.64	dB(SPL)	76.51	dB(SPL)	36.6	s	79.29
3	4	LuiWaterfalls	LuiWaterfalls1	3_4	2023-05-28	LW	2	29	1	1	1	1	1	1	5	1	1	1	1	1	2	5	1	5	1	2	1	2	4	5	1	5	1	2	1	2	4	0.56066	0.103553	5	5	5	77.64	dB(SPL)	76.51	dB(SPL)	36.6	s	79.29
4	4	LuiWaterfalls	LuiWaterfalls1	4_4	2023-05-28	LW	2	65	2	1	1	1	1	1	5	1	1	1	1	1	2	5	3	5	1	2	1	1	1	5	3	5	1	2	1	1	1	0.633883	0.366117	5	5	5	77.64	dB(SPL)	76.51	dB(SPL)	36.6	s	79.29
5	4	LuiWaterfalls	LuiWaterfalls1	5_4	2023-05-28	LW	1	61	1	1	1	1	1	1	5	1	1	1	1	1	2	5	1	5	4	4	1	2	2	5	1	5	4	4	1	2	2	0.853553	-0.207107	5	5	5	77.64	dB(SPL)	76.51	dB(SPL)	36.6	s	79.29
6	4	LuiWaterfalls	LuiWaterfalls1	6_4	2023-05-28	LW	2	28	1	1	1	1	1	1	5	1	1	1	1	1	2	5	4	4	3	4	1	3	5	5	4	4	3	4	1	3	5	0.34099	-0.0732233	5	5	5	77.64	dB(SPL)	76.51	dB(SPL)	36.6	s	79.29
7	4	LuiWaterfalls	LuiWaterfalls1	7_4	2023-05-28	LW	1	24	1	1	1	2	3	2	5	1	1	1	2	1	2	5	4	4	3	3	1	3	3	5	4	4	3	3	1	3	3	0.414214	0.146447	5	5	5	77.64	dB(SPL)	76.51	dB(SPL)	36.6	s	79.29
8	4	LuiWaterfalls	LuiWaterfalls1	8_4	2023-05-28	LW	2	29	2	1	1	1	2	2	5	1	1	1	1	1	2	5	3	4	2	3	1	3	3	5	3	4	2	3	1	3	3	0.487437	0.176777	5	5	5	77.64	dB(SPL)	76.51	dB(SPL)	36.6	s	79.29
9	4	LuiWaterfalls	LuiWaterfalls1	9_4	2023-05-28	LW	1	36	1	1	1	1	2	2	5	1	1	1	1	1	2	5	3	3	2	5	1	4	1	5	3	3	2	5	1	4	1	0.707107	0.207107	5	5	5	77.64	dB(SPL)	76.51	dB(SPL)	36.6	s	79.29
10	4	LuiWaterfalls	LuiWaterfalls1	10_4	2023-05-28	LW	1	64	1	1	1	1	1	1	5	1	1	1	1	1	2	4	1	5	1	3	1	4	2	4	1	5	1	3	1	4	2	0.676777	0.383883	5	5	5	77.64	dB(SPL)	76.51	dB(SPL)	36.6	s	79.29
11	4	LuiWaterfalls	LuiWaterfalls1	11_4	2023-05-28	LW	1	22	2	1	1	2	2	1	5	1	1	1	1	1	2	5	5	4	1	4	2	4	2	5	5	4	1	4	2	4	2	0.383883	0.53033	5	5	5	77.64	dB(SPL)	76.51	dB(SPL)	36.6	s	79.29
12	4	LuiWaterfalls	LuiWaterfalls1	12_4	2023-05-28	LW	1	34	1	1	1	1	2	1	5	1	1	1	1	1	2	5	2	5	2	5	1	3	1	5	2	5	2	5	1	3	1	0.926777	0.176777	5	5	5	77.64	dB(SPL)	76.51	dB(SPL)	36.6	s	79.29
13	4	LuiWaterfalls	LuiWaterfalls1	13_4	2023-05-28	LW	2	26	1	1	1	2		1	5	1	1	1	2	1	2	5	4	5	1	4	1	4	1	5	4	5	1	4	1	4	1	0.707107	0.603553	5	5	5	77.64	dB(SPL)	76.51	dB(SPL)	36.6	s	79.29
14	4	LuiWaterfalls	LuiWaterfalls1	14_4	2023-05-28	LW	1	28	1	1	1	3	2	2	5	1	1	2	1	1	2	5	1	5	1	4	1	5	1	5	1	5	1	4	1	5	1	0.926777	0.487437	5	5	5	77.64	dB(SPL)	76.51	dB(SPL)	36.6	s	79.29
15	4	LuiWaterfalls	LuiWaterfalls1	15_4	2023-05-28	LW	2	40	2	1	1	1	1	1	5	1	1	1	1	1	2	4	4	4	2	4	3	4	3	4	4	4	2	4	3	4	3	0.176777	0.28033	4	4	4	77.64	dB(SPL)	76.51	dB(SPL)	36.6	s	79.29
16	4	LuiWaterfalls	LuiWaterfalls1	16_4	2023-05-28	LW	1	36	1	1	1	1	3	2	5	1	1	1	2	1	2	5	2	4	2	4	2	4	3	5	2	4	2	4	2	4	3	0.53033	0.133883	5	5	5	77.64	dB(SPL)	76.51	dB(SPL)	36.6	s	79.29
17	4	LuiWaterfalls	LuiWaterfalls1	17_4	2023-05-28	LW	1	40	2	1	1	1	1	1	5	1	1	1	1	1	2	4	3	3	3	4	4	4	4	4	3	3	3	4	4	4	4	0	-0.0428932	4	4	5	77.64	dB(SPL)	76.51	dB(SPL)	36.6	s	79.29
18	4	LuiWaterfalls	LuiWaterfalls1	18_4	2023-05-28	LW	1	54	2	1	1	1	3	1	1	1	1	1	2	1	1	5	3	4	4	5	2	1	3	5	3	4	4	5	2	1	3	0.53033	-0.383883	5	5	5	77.64	dB(SPL)	76.51	dB(SPL)	36.6	s	79.29
19	4	LuiWaterfalls	LuiWaterfalls1	19_4	2023-05-28	LW	1	49	2	1	1	1	1	1	5	1	1	1	1	1	2	4	4	4	1	1	1	5	3	4	4	4	1	1	1	5	3	0.164214	0.707107	4	5	4	77.64	dB(SPL)	76.51	dB(SPL)	36.6	s	79.29
20	4	LuiWaterfalls	LuiWaterfalls1	20_4	2023-05-28	LW	2	37	1	1	1	1	1	1	5	1	1	1	1	1	2	5	2	4	2	4	1	2	2	5	2	4	2	4	1	2	2	0.707107	0	5	5	5	77.64	dB(SPL)	76.51	dB(SPL)	36.6	s	79.29
21	4	LuiWaterfalls	LuiWaterfalls1	21_4	2023-05-28	LW	1	25	1	1	1	2	1	1	5	1	1	1	1	1	2	3	3	3	1	2	1	1	1	3	3	3	1	2	1	1	1	0.28033	0.21967				77.64	dB(SPL)	76.51	dB(SPL)	36.6	s	79.29
22	4	LuiWaterfalls	LuiWaterfalls1	22_4	2023-05-28	LW	1	30	2	1	1	1	1	2	5	1	1	1	1	1	2	4	2	4	4	3	1	4	4	4	2	4	4	3	1	4	4	0.383883	-0.0732233	4	5	4	77.64	dB(SPL)	76.51	dB(SPL)	36.6	s	79.29
23	4	LuiWaterfalls	LuiWaterfalls1	23_4	2023-05-28	LW	2	65	1	1	1	1	1	1	5	1	1	1	1	1	2	5	1	5	1	4	1	2	2	5	1	5	1	4	1	2	2	0.853553	0.103553	5	5	5	77.64	dB(SPL)	76.51	dB(SPL)	36.6	s	79.29
24	4	LuiWaterfalls	LuiWaterfalls1	24_4	2023-05-28	LW	2	24	2	1	1	1	1	1	5	1	1	1	1	1	2	5	3	5	2	4	3	3	2	5	3	5	2	4	3	3	2	0.5	0.25	5	5	5	77.64	dB(SPL)	76.51	dB(SPL)	36.6	s	79.29
25	4	LuiWaterfalls	LuiWaterfalls1	25_4	2023-05-28	LW	2	52	1							2	2	2	2	2	2																	0	0				77.64	dB(SPL)	76.51	dB(SPL)	36.6	s	79.29
1	5	RifugioAuronzo	RifugioAuronzo1	1_5	2023-06-25	RA	4	28	2	3	1	5	2	1	1	2	1	2	1	1	1	3	4	4	2	2	3	4	2	3	4	4	2	2	3	4	2	0	0.5	3	3	4	69.58	dB(SPL)	57.31	dB(SPL)	55.9	s	81.84
2	5	RifugioAuronzo	RifugioAuronzo1	2_5	2023-06-25	RA	1	24	1	4	1	5	1	2	1	2	1	2	1	1	1	3	5	5	1	1	3	5	1	3	5	5	1	1	3	5	1	0	1	4	3	5	69.58	dB(SPL)	57.31	dB(SPL)	55.9	s	81.84
3	5	RifugioAuronzo	RifugioAuronzo1	3_5	2023-06-25	RA	2	46	2	2	1	5	3	1	1	1	1	2	2	1	1	2	4	3	1	1	5	2	2	2	4	3	1	1	5	2	2	-0.457107	0.396447	2	1	5	69.58	dB(SPL)	57.31	dB(SPL)	55.9	s	81.84
4	5	RifugioAuronzo	RifugioAuronzo1	4_5	2023-06-25	RA	1	55	1	4	1	5	1	1	1	2	1	2	1	1	1	4	3	3	2	2	4	4	2	4	3	3	2	2	4	4	2	0	0.353553	2	2	5	69.58	dB(SPL)	57.31	dB(SPL)	55.9	s	81.84
5	5	RifugioAuronzo	RifugioAuronzo1	5_5	2023-06-25	RA	2	51	2	3		5	1	2	1	2	2	2	1	1	1	3	3	3	4	3	4	4	3	3	3	3	4	3	4	4	3	-0.103553	0	2	2	5	69.58	dB(SPL)	57.31	dB(SPL)	55.9	s	81.84
6	5	RifugioAuronzo	RifugioAuronzo1	6_5	2023-06-25	RA	2	32	1	3	1	5	2	1	1	2	1	2	1	1	1	2	4	2	2	2	3	2	3	2	4	2	2	2	3	2	3	-0.323223	0.0732233	2	2	5	69.58	dB(SPL)	57.31	dB(SPL)	55.9	s	81.84
7	5	RifugioAuronzo	RifugioAuronzo1	7_5	2023-06-25	RA	2		1	3	3	5	1	2	1	2	2	2	1	1	1	3	4	3	2	2	3	3	1	3	4	3	2	2	3	3	1	0	0.396447	2	2	4	69.58	dB(SPL)	57.31	dB(SPL)	55.9	s	81.84
8	5	RifugioAuronzo	RifugioAuronzo1	8_5	2023-06-25	RA	1	32	1	3	1	5	2	3	1	2	1	2	1	2	1	2	4	3	2	2	4	4	1	2	4	3	2	2	4	4	1	-0.207107	0.5	2	1	5	69.58	dB(SPL)	57.31	dB(SPL)	55.9	s	81.84
9	5	RifugioAuronzo	RifugioAuronzo1	9_5	2023-06-25	RA	1	30	1	4	2	4	2	2	1	2	1	2	1	1	1	2	5	4	2	2	5	5	2	2	5	4	2	2	5	5	2	-0.383883	0.676777	2	2	5	69.58	dB(SPL)	57.31	dB(SPL)	55.9	s	81.84
10	5	RifugioAuronzo	RifugioAuronzo1	10_5	2023-06-25	RA	2	22	1	2	1	4	2	2	1	1	1	2	1	1	1	4	4	4	2	2	4	4	2	4	4	4	2	2	4	4	2	0	0.5	3	4	5	69.58	dB(SPL)	57.31	dB(SPL)	55.9	s	81.84
11	5	RifugioAuronzo	RifugioAuronzo1	11_5	2023-06-25	RA	1		1	3	1	5	2	3	1	2	1	2	1	2	1	4	3	2	2	2	3	4	3	4	3	2	2	2	3	4	3	-0.0428932	0.207107	3	2	5	69.58	dB(SPL)	57.31	dB(SPL)	55.9	s	81.84
12	5	RifugioAuronzo	RifugioAuronzo1	12_5	2023-06-25	RA	2	28	1							2	2	2	2	2	2																	0	0				69.58	dB(SPL)	57.31	dB(SPL)	55.9	s	81.84
13	5	RifugioAuronzo	RifugioAuronzo1	13_5	2023-06-25	RA	2	28	1							2	2	2	2	2	2																	0	0				69.58	dB(SPL)	57.31	dB(SPL)	55.9	s	81.84
14	5	RifugioAuronzo	RifugioAuronzo1	14_5	2023-06-25	RA	2	27	1	3	1	4	3	2	1	2	1	2	2	1	1	2	4	3	2	1	2	5	1	2	4	3	2	1	2	5	1	-0.0732233	0.676777	3	4	5	69.58	dB(SPL)	57.31	dB(SPL)	55.9	s	81.84
15	5	RifugioAuronzo	RifugioAuronzo1	15_5	2023-06-25	RA	1	29	1	4	2	5	2	2	1	2	1	2	1	1	1	2	4	5	1	1	4	4	3	2	4	5	1	1	4	4	3	-0.28033	0.676777	1	2	4	69.58	dB(SPL)	57.31	dB(SPL)	55.9	s	81.84
16	5	RifugioAuronzo	RifugioAuronzo1	16_5	2023-06-25	RA	2	58	1	4	1	5	2	3	1	2	1	2	1	2	1	2	3	3	3	3	4	3	2	2	3	3	3	3	4	3	2	-0.133883	0.0732233	2	1	2	69.58	dB(SPL)	57.31	dB(SPL)	55.9	s	81.84
17	5	RifugioAuronzo	RifugioAuronzo1	17_5	2023-06-25	RA	1	29	1	4	1	4	1	2	1	2	1	2	1	1	1	2	5	2	2	2	4	4	2	2	5	2	2	2	4	4	2	-0.426777	0.426777	2	1	4	69.58	dB(SPL)	57.31	dB(SPL)	55.9	s	81.84
18	5	RifugioAuronzo	RifugioAuronzo1	18_5	2023-06-25	RA	2	25	1	5	3	4	1	1	1	2	2	2	1	1	1	1	5	3	1	1	5	5	1	1	5	3	1	1	5	5	1	-0.56066	0.853553	1	1	4	69.58	dB(SPL)	57.31	dB(SPL)	55.9	s	81.84
19	5	RifugioAuronzo	RifugioAuronzo1	19_5	2023-06-25	RA	2	65	1	2	1	4	1	1	1	1	1	2	1	1	1	4	3	3	4	3	1	3	1	4	3	3	4	3	1	3	1	0.457107	0.0428932	3	3	5	69.58	dB(SPL)	57.31	dB(SPL)	55.9	s	81.84
20	5	RifugioAuronzo	RifugioAuronzo1	20_5	2023-06-25	RA	1	77	1	2	1	4	1	1	1	1	1	2	1	1	1	2	4	2	4	2	3	4	4	2	4	2	4	2	3	4	4	-0.396447	0	3	3	5	69.58	dB(SPL)	57.31	dB(SPL)	55.9	s	81.84
21	5	RifugioAuronzo	RifugioAuronzo1	21_5	2023-06-25	RA	1	33	1	2	1	5	2	1	1	1	1	2	1	1	1	2	4	3	2	1	3	4	2	2	4	3	2	1	3	4	2	-0.25	0.5	3	1	5	69.58	dB(SPL)	57.31	dB(SPL)	55.9	s	81.84
22	5	RifugioAuronzo	RifugioAuronzo1	22_5	2023-06-25	RA	2	23	2	3	1	4	4	3	1	2	1	2	2	2	1	3	5	4	2	3	2	4	1	3	5	4	2	3	2	4	1	0.176777	0.573223	2	3	5	69.58	dB(SPL)	57.31	dB(SPL)	55.9	s	81.84
23	5	RifugioAuronzo	RifugioAuronzo1	23_5	2023-06-25	RA	1	56	2	3	1	4	2	2	1	2	1	2	1	1	1	4	2	4	3	3	1	4	1	4	2	4	3	3	1	4	1	0.603553	0.25	3	1	5	69.58	dB(SPL)	57.31	dB(SPL)	55.9	s	81.84
24	5	RifugioAuronzo	RifugioAuronzo1	24_5	2023-06-25	RA	2	34	2	4	1	5	2	1	1	2	1	2	1	1	1	2	5	3	2	1	4	3	2	2	5	3	2	1	4	3	2	-0.426777	0.46967	2	2	5	69.58	dB(SPL)	57.31	dB(SPL)	55.9	s	81.84
25	5	RifugioAuronzo	RifugioAuronzo1	25_5	2023-06-25	RA	2	57	2	3	2	4	2	2	1	2	1	2	1	1	1	1	2	2	2	2	4	3	2	1	2	2	2	2	4	3	2	-0.31066	0.103553	1	2	5	69.58	dB(SPL)	57.31	dB(SPL)	55.9	s	81.84
1	2	ValVenegia	ValVenegia1	1_2	2022-06-19	VV	1	28	1	3	1	2	2	1	4	2	1	1	1	1	2	4	3	3	2	4	2	4	2	4	3	3	2	4	2	4	2	0.353553	0.207107	4	4	4	72.3	dB(SPL)	61.39	dB(SPL)	52.6	s	85.69
2	2	ValVenegia	ValVenegia1	2_2	2022-06-19	VV	1	55	1	1	1	2	3	3	5	1	1	1	2	2	2	5	1	4	4	4	1	3	1	5	1	4	4	4	1	3	1	0.853553	-0.103553	5	5	5	72.3	dB(SPL)	61.39	dB(SPL)	52.6	s	85.69
3	2	ValVenegia	ValVenegia1	3_2	2022-06-19	VV	2	56	2	1	1	1	2	2	5	1	1	1	1	1	2	5	2	4	4	4	2	2	2	5	2	4	4	4	2	2	2	0.603553	-0.207107	4	4	4	72.3	dB(SPL)	61.39	dB(SPL)	52.6	s	85.69
4	2	ValVenegia	ValVenegia1	4_2	2022-06-19	VV	1	34	1	2	1	2	4	1	5	1	1	1	2	1	2	5	1	5	5	4	1	3	1	5	1	5	5	4	1	3	1	0.926777	-0.133883	5	4	5	72.3	dB(SPL)	61.39	dB(SPL)	52.6	s	85.69
5	2	ValVenegia	ValVenegia1	5_2	2022-06-19	VV	1	23	1	2	1	2	2	1	5	1	1	1	1	1	2	4	2	4	4	4	2	3	2	4	2	4	4	4	2	3	2	0.5	-0.103553	2	4	4	72.3	dB(SPL)	61.39	dB(SPL)	52.6	s	85.69
6	2	ValVenegia	ValVenegia1	6_2	2022-06-19	VV	2	23	1	1	1	2	2	5	5	1	1	1	1	2	2	5	1	5	4	4	1	4	1	5	1	5	4	4	1	4	1	0.926777	0.0732233	5	5	4	72.3	dB(SPL)	61.39	dB(SPL)	52.6	s	85.69
1	2	ParcheggioValVenegia	ParcheggioValVenegia1	1_2	2022-06-19	PVV1	1	28	1	3	1	2	3	2	3	2	1	1	2	1	2	3	4	3	2	3	4	3	2	3	4	3	2	3	4	3	2	-0.103553	0.25	3	3	3	72.9	dB(SPL)	61.03	dB(SPL)	55.7	s	82.19
2	2	ParcheggioValVenegia	ParcheggioValVenegia1	2_2	2022-06-19	PVV1	1	55	1	2	1	1	3	3	3	1	1	1	2	2	2	4	2	3	4	4	1	3	2	4	2	3	4	4	1	3	2	0.53033	-0.176777	4	5	4	72.9	dB(SPL)	61.03	dB(SPL)	55.7	s	82.19
3	2	ParcheggioValVenegia	ParcheggioValVenegia1	3_2	2022-06-19	PVV1	2	56	2	3	0	1	3	0	3	2	2	1	2	2	2	2	5	3	2	2	4	4	2	2	5	3	2	2	4	4	2	-0.353553	0.5	4	3	4	72.9	dB(SPL)	61.03	dB(SPL)	55.7	s	82.19
4	2	ParcheggioValVenegia	ParcheggioValVenegia1	4_2	2022-06-19	PVV1	1	34	1	2	1	1	4	3	4	1	1	1	2	2	2	5	2	5	4	3	2	4	2	5	2	5	4	3	2	4	2	0.603553	0.146447	4	4	4	72.9	dB(SPL)	61.03	dB(SPL)	55.7	s	82.19
5	2	ParcheggioValVenegia	ParcheggioValVenegia1	5_2	2022-06-19	PVV1	1	23	1	4	1	2	4	4	4	2	1	1	2	2	2	2	3	2	2	3	4	5	3	2	3	2	2	3	4	5	3	-0.28033	0.237437	2	2	3	72.9	dB(SPL)	61.03	dB(SPL)	55.7	s	82.19
6	2	ParcheggioValVenegia	ParcheggioValVenegia1	6_2	2022-06-19	PVV1	2	23	1	3	1	2	3	4	4	2	1	1	2	2	2	2	3	2	4	2	3	2	3	2	3	2	4	2	3	2	3	-0.25	-0.207107	3	4	3	72.9	dB(SPL)	61.03	dB(SPL)	55.7	s	82.19
1	2	ParcheggioValVenegia	ParcheggioValVenegia2	1_2	2022-06-19	PVV2	1	28	1	3	1	3	3	2	2	2	1	2	2	1	1	2	4	4	1	1	3	4	2	2	4	4	1	1	3	4	2	-0.176777	0.676777	2	2	3	67.39	dB(SPL)	53.71	dB(SPL)	20.9	s	75.42
2	2	ParcheggioValVenegia	ParcheggioValVenegia2	2_2	2022-06-19	PVV2	1	55	1	2	1	2	3	3	4	1	1	1	2	2	2	5	1	4	3	4	1	3	1	5	1	4	3	4	1	3	1	0.853553	0	3	4	3	67.39	dB(SPL)	53.71	dB(SPL)	20.9	s	75.42
3	2	ParcheggioValVenegia	ParcheggioValVenegia2	3_2	2022-06-19	PVV2	2	56	2	3	1	2	3	2	4	2	1	1	2	1	2	5	2	3	4	4	2	2	2	5	2	3	4	4	2	2	2	0.53033	-0.28033	3	3	3	67.39	dB(SPL)	53.71	dB(SPL)	20.9	s	75.42
4	2	ParcheggioValVenegia	ParcheggioValVenegia2	4_2	2022-06-19	PVV2	1	34	1	4	1	4	3	3	4	2	1	2	2	2	2	4	3	3	2	2	3	3	3	4	3	3	2	2	3	3	3	0.0303301	0.176777	4	3	4	67.39	dB(SPL)	53.71	dB(SPL)	20.9	s	75.42
5	2	ParcheggioValVenegia	ParcheggioValVenegia2	5_2	2022-06-19	PVV2	1	23	1	2	1	3	1	2	3	1	1	2	1	1	2	3	2	3	4	4	2	2	3	3	2	3	4	4	2	2	3	0.25	-0.353553	3	3	3	67.39	dB(SPL)	53.71	dB(SPL)	20.9	s	75.42
6	2	ParcheggioValVenegia	ParcheggioValVenegia2	6_2	2022-06-19	PVV2	2	23	1	5	1	3	2	2	2	2	1	2	1	1	1	2	4	2	3	2	3	4	4	2	4	2	3	2	3	4	4	-0.396447	0.103553	2	3	3	67.39	dB(SPL)	53.71	dB(SPL)	20.9	s	75.42
1	5	ForcellaLavaredo	ForcellaLavaredo1	1_5	2023-06-25	FL	4	28	2	1	1	5	2	1	1	1	1	2	1	1	1	3	3	4	2	2	2	3	3	3	3	4	2	2	2	3	3	0.103553	0.25	3	3	5	59.91	dB(SPL)	48.31	dB(SPL)	0.048	s	70.82
2	5	ForcellaLavaredo	ForcellaLavaredo1	2_5	2023-06-25	FL	1	24	1	1	1	5	1	2	1	1	1	2	1	1	1	4	4	4	2	2	3	4	2	4	4	4	2	2	3	4	2	0.103553	0.5	4	3	5	59.91	dB(SPL)	48.31	dB(SPL)	0.048	s	70.82
3	5	ForcellaLavaredo	ForcellaLavaredo1	3_5	2023-06-25	FL	2	46	2	1	1	5	2	1	1	1	1	2	1	1	1	2	5	4	1	1	5	4	1	2	5	4	1	1	5	4	1	-0.383883	0.823223	1	1	5	59.91	dB(SPL)	48.31	dB(SPL)	0.048	s	70.82
4	5	ForcellaLavaredo	ForcellaLavaredo1	4_5	2023-06-25	FL	1	55	1	1	1	5	1	2	1	1	1	2	1	1	1	1	2	3	3	3	2	3	2	1	2	3	3	3	2	3	2	0.0428932	0	2	1	5	59.91	dB(SPL)	48.31	dB(SPL)	0.048	s	70.82
5	5	ForcellaLavaredo	ForcellaLavaredo1	5_5	2023-06-25	FL	2	51	2	3	1	5	1	1	1	2	1	2	1	1	1	2	4	2	4	2	4	3	2	2	4	2	4	2	4	3	2	-0.353553	0.0428932	2	1	5	59.91	dB(SPL)	48.31	dB(SPL)	0.048	s	70.82
6	5	ForcellaLavaredo	ForcellaLavaredo1	6_5	2023-06-25	FL	2	32	1	1	1	4	2	2	1	1	1	2	1	1	1	3	3	2	4	2	2	3	2	3	3	2	4	2	2	3	2	0.0303301	-0.0303301	3	3	5	59.91	dB(SPL)	48.31	dB(SPL)	0.048	s	70.82
7	5	ForcellaLavaredo	ForcellaLavaredo1	7_5	2023-06-25	FL	2		1	1	1	4	2	4	1	1	1	2	1	2	1	3	4	3	3	3	3	4	1	3	4	3	3	3	3	4	1	0.0732233	0.323223	3	2	5	59.91	dB(SPL)	48.31	dB(SPL)	0.048	s	70.82
8	5	ForcellaLavaredo	ForcellaLavaredo1	8_5	2023-06-25	FL	1	32	1	1	1	5	2	2	1	1	1	2	1	1	1	2	4	3	4	3	3	2	3	2	4	3	4	3	3	2	3	-0.176777	-0.133883	2	1	5	59.91	dB(SPL)	48.31	dB(SPL)	0.048	s	70.82
9	5	ForcellaLavaredo	ForcellaLavaredo1	9_5	2023-06-25	FL	1	30	1	2	1	5	2	2	1	1	1	2	1	1	1	3	3	4	2	2	3	3	2	3	3	4	2	2	3	3	2	0.0732233	0.323223	3	2	5	59.91	dB(SPL)	48.31	dB(SPL)	0.048	s	70.82
10	5	ForcellaLavaredo	ForcellaLavaredo1	10_5	2023-06-25	FL	2	22	1	1	1	4	1	1	1	1	1	2	1	1	1	5	2	3	4	3	1	3	2	5	2	3	4	3	1	3	2	0.56066	-0.103553	4	3	5	59.91	dB(SPL)	48.31	dB(SPL)	0.048	s	70.82
11	5	ForcellaLavaredo	ForcellaLavaredo1	11_5	2023-06-25	FL	1		1	2	1	5	2	3	1	1	1	2	1	2	1	3	4	3	3	2	4	4	2	3	4	3	3	2	4	4	2	-0.176777	0.323223	4	2	5	59.91	dB(SPL)	48.31	dB(SPL)	0.048	s	70.82
12	5	ForcellaLavaredo	ForcellaLavaredo1	12_5	2023-06-25	FL	2	28	1	1	1	4	1	1	1	1	1	2	1	1	1	3	3	3	4	3	2	2	2	3	3	3	4	3	2	2	2	0.176777	-0.133883	3	2	4	59.91	dB(SPL)	48.31	dB(SPL)	0.048	s	70.82
13	5	ForcellaLavaredo	ForcellaLavaredo1	13_5	2023-06-25	FL	2	28	1	1	1	5	1	4	1	1	1	2	1	2	1	4	3	4	2	2	3	4	2	4	3	4	2	2	3	4	2	0.176777	0.426777	3	3	5	59.91	dB(SPL)	48.31	dB(SPL)	0.048	s	70.82
14	5	ForcellaLavaredo	ForcellaLavaredo1	14_5	2023-06-25	FL	2	27	1	1	1	5	2	2	1	1	1	2	1	1	1	2	4	4	2	1	5	4	2	2	4	4	2	1	5	4	2	-0.383883	0.573223	2	1	5	59.91	dB(SPL)	48.31	dB(SPL)	0.048	s	70.82
15	5	ForcellaLavaredo	ForcellaLavaredo1	15_5	2023-06-25	FL	1	29	1	1	1	5	1	2	1	1	1	2	1	1	1	2	4	4	2	1	4	4	3	2	4	4	2	1	4	4	3	-0.353553	0.5	3	3	5	59.91	dB(SPL)	48.31	dB(SPL)	0.048	s	70.82
16	5	ForcellaLavaredo	ForcellaLavaredo1	16_5	2023-06-25	FL	2	58	1	1	1	5	3	3	1	1	1	2	2	2	1	2	4	3	3	2	3	3	2	2	4	3	3	2	3	3	2	-0.176777	0.21967	2	1	2	59.91	dB(SPL)	48.31	dB(SPL)	0.048	s	70.82
17	5	ForcellaLavaredo	ForcellaLavaredo1	17_5	2023-06-25	FL	1	29	1	1	1	5	1	2	1	1	1	2	1	1	1	2	5	2	2	1	4	3	4	2	5	2	2	1	4	3	4	-0.646447	0.25	2	2	5	59.91	dB(SPL)	48.31	dB(SPL)	0.048	s	70.82
18	5	ForcellaLavaredo	ForcellaLavaredo1	18_5	2023-06-25	FL	2	25	1	1	1	4	1	1	1	1	1	2	1	1	1	1	5	1	1	1	5	4	1	1	5	1	1	1	5	4	1	-0.707107	0.603553	2	1	5	59.91	dB(SPL)	48.31	dB(SPL)	0.048	s	70.82
19	5	ForcellaLavaredo	ForcellaLavaredo1	19_5	2023-06-25	FL	2	65	1	1	1	4	1	1	1	1	1	2	1	1	1	5	3	3	4	3	3	3	2	5	3	3	4	3	3	3	2	0.28033	-0.0303301	5	1	5	59.91	dB(SPL)	48.31	dB(SPL)	0.048	s	70.82
20	5	ForcellaLavaredo	ForcellaLavaredo1	20_5	2023-06-25	FL	1	77	1	1	1	4	1	3	1	1	1	2	1	2	1	3	4	2	4	3	3	2	4	3	4	2	4	3	3	2	4	-0.21967	-0.28033	3	2	4	59.91	dB(SPL)	48.31	dB(SPL)	0.048	s	70.82
21	5	ForcellaLavaredo	ForcellaLavaredo1	21_5	2023-06-25	FL	1	33	1	1	1	4	2	2	1	1	1	2	1	1	1	4	2	3	3	2	4	3	2	4	2	3	3	2	4	3	2	0.0732233	0.0732233	2	1	5	59.91	dB(SPL)	48.31	dB(SPL)	0.048	s	70.82
22	5	ForcellaLavaredo	ForcellaLavaredo1	22_5	2023-06-25	FL	2	23	2	2	1	4	3	2	1	1	1	2	2	1	1	4	3	3	4	4	2	4	2	4	3	3	4	4	2	4	2	0.353553	0	4	3	5	59.91	dB(SPL)	48.31	dB(SPL)	0.048	s	70.82
23	5	ForcellaLavaredo	ForcellaLavaredo1	23_5	2023-06-25	FL	1	56	2	1	1	4	1	3	1	1	1	2	1	2	1	5	3	4	3	3	1	3	1	5	3	4	3	3	1	3	1	0.633883	0.21967	4	3	5	59.91	dB(SPL)	48.31	dB(SPL)	0.048	s	70.82
24	5	ForcellaLavaredo	ForcellaLavaredo1	24_5	2023-06-25	FL	2	34	2	1	1	5	2	2	1	1	1	2	1	1	1	2	4	2	2	1	5	2	2	2	4	2	2	1	5	2	2	-0.53033	0.21967	2	1	5	59.91	dB(SPL)	48.31	dB(SPL)	0.048	s	70.82
25	5	ForcellaLavaredo	ForcellaLavaredo1	25_5	2023-06-25	FL	2	57	2	1	1	4	2	2	1	1	1	2	1	1	1	4	3	3	2	2	4	2	2	4	3	3	2	2	4	2	2	0	0.146447	2	1	5	59.91	dB(SPL)	48.31	dB(SPL)	0.048	s	70.82
1	1	HotelBraies	HotelBraies1	1_1	2022-04-24	HB	4	40	1	1	1	4	3	1	1	1	1	2	2	1	1	2	2	3	1	1	4	4	1	2	2	3	1	1	4	4	1	-0.133883	0.53033	2	2	2	56.96	dB(SPL)	49.74	dB(SPL)	8.67	s	69.67
2	1	HotelBraies	HotelBraies1	2_1	2022-04-24	HB	1	26	2	1	1	5	3	2	2	1	1	2	2	1	1	3	4	2	4	2	1	2	1	3	4	2	4	2	1	2	1	0.133883	0.0125631	4	3	5	56.96	dB(SPL)	49.74	dB(SPL)	8.67	s	69.67
3	1	HotelBraies	HotelBraies1	3_1	2022-04-24	HB	2	22	1	1	1	5	3	2	1	1	1	2	2	1	1	4	2	3	2	3	2	4	3	4	2	3	2	3	2	4	3	0.28033	0.133883	3	3	5	56.96	dB(SPL)	49.74	dB(SPL)	8.67	s	69.67
4	1	HotelBraies	HotelBraies1	4_1	2022-04-24	HB	1	35	2	1	1	5	4	3	2	1	1	2	2	2	1	2	4	2	3	2	4	4	2	2	4	2	3	2	4	4	2	-0.353553	0.25	2	2	4	56.96	dB(SPL)	49.74	dB(SPL)	8.67	s	69.67
5	1	HotelBraies	HotelBraies1	5_1	2022-04-24	HB	1	42	1	2	1	4	3	2	2	1	1	2	2	1	1	2	4	4	4	2	4	4	3	2	4	4	4	2	4	4	3	-0.28033	0.21967	3	3	5	56.96	dB(SPL)	49.74	dB(SPL)	8.67	s	69.67
6	1	HotelBraies	HotelBraies1	6_1	2022-04-24	HB	2	22	2	1	1	4	3	1	1	1	1	2	2	1	1	4	4	3	3	3	2	5	1	4	4	3	3	3	2	5	1	0.28033	0.426777	3	3	5	56.96	dB(SPL)	49.74	dB(SPL)	8.67	s	69.67
7	1	HotelBraies	HotelBraies1	7_1	2022-04-24	HB	2	22	2	1		4	3	2	1	1	2	2	2	1	1	4	3	3	4	4	2	3	3	4	3	3	4	4	2	3	3	0.28033	-0.176777	4	4	5	56.96	dB(SPL)	49.74	dB(SPL)	8.67	s	69.67
8	1	HotelBraies	HotelBraies1	8_1	2022-04-24	HB	1	23	1	2	1	5	1	3	3	1	1	2	1	2	2	2	5	4	2	2	3	4	2	2	5	4	2	2	3	4	2	-0.176777	0.573223	3	2	4	56.96	dB(SPL)	49.74	dB(SPL)	8.67	s	69.67
9	1	HotelBraies	HotelBraies1	9_1	2022-04-24	HB	1	27	1	1	1	5	3	1	1	1	1	2	2	1	1	2	4	3	4	2	3	4	2	2	4	3	4	2	3	4	2	-0.176777	0.21967	3	3	5	56.96	dB(SPL)	49.74	dB(SPL)	8.67	s	69.67
10	1	HotelBraies	HotelBraies1	10_1	2022-04-24	HB	1	19	2	1	1	4	3	2	1	1	1	2	2	1	1	3	4	3	1	2	3	4	1	3	4	3	1	2	3	4	1	0	0.603553	3	2	5	56.96	dB(SPL)	49.74	dB(SPL)	8.67	s	69.67
11	1	HotelBraies	HotelBraies1	11_1	2022-04-24	HB	2	27	1	1	1	5	2	1	1	1	1	2	1	1	1	4	4	4	2	2	4	4	2	4	4	4	2	2	4	4	2	0	0.5	2	2	5	56.96	dB(SPL)	49.74	dB(SPL)	8.67	s	69.67
12	1	HotelBraies	HotelBraies1	12_1	2022-04-24	HB	2	27	2	1	1	5	3	2	1	1	1	2	2	1	1	2	4	1	2	1	3	4	2	2	4	1	2	1	3	4	2	-0.396447	0.353553	2	1	5	56.96	dB(SPL)	49.74	dB(SPL)	8.67	s	69.67
13	1	HotelBraies	HotelBraies1	13_1	2022-04-24	HB	2		1	2	1	5	3	2	1	1	1	2	2	1	1	2	4	2	2	2	4	3	3	2	4	2	2	2	4	3	3	-0.426777	0.176777	2	2	5	56.96	dB(SPL)	49.74	dB(SPL)	8.67	s	69.67
14	1	HotelBraies	HotelBraies1	14_1	2022-04-24	HB	2	27	2	1	1	4	4	2	1	1	1	2	2	1	1	3	4	2	2	2	2	4	1	3	4	2	2	2	2	4	1	0.0303301	0.426777	3	3	5	56.96	dB(SPL)	49.74	dB(SPL)	8.67	s	69.67
1	5	Dreizinenhutte	Dreizinnenhutte1	1_5	2023-06-25	DZ	4	28	2	1	1	4	2	2	1	1	1	2	1	1	1	3	2	4	4	2	3	2	3	3	2	4	4	2	3	2	3	0.0732233	-0.133883	3	2	5	59.36	dB(SPL)	54.53	dB(SPL)	11.4	s	66.74
2	5	Dreizinenhutte	Dreizinnenhutte1	2_5	2023-06-25	DZ	1	24	1	1	2	5	2	3	1	1	1	2	1	2	1	4	4	2	2	2	3	4	2	4	4	2	2	2	3	4	2	-0.0428932	0.353553	4	3	5	59.36	dB(SPL)	54.53	dB(SPL)	11.4	s	66.74
3	5	Dreizinenhutte	Dreizinnenhutte1	3_5	2023-06-25	DZ	2	46	2	1	2	4	1	1	1	1	1	2	1	1	1	4	2	4	2	4	2	4	2	4	2	4	2	4	2	4	2	0.5	0.207107	3	3	5	59.36	dB(SPL)	54.53	dB(SPL)	11.4	s	66.74
4	5	Dreizinenhutte	Dreizinnenhutte1	4_5	2023-06-25	DZ	1	55	1	1	1	5	2	2	1	1	1	2	1	1	1	3	3	4	3	3	3	3	2	3	3	4	3	3	3	3	2	0.146447	0.146447	2	2	5	59.36	dB(SPL)	54.53	dB(SPL)	11.4	s	66.74
5	5	Dreizinenhutte	Dreizinnenhutte1	5_5	2023-06-25	DZ	2	51	2	1	1	4	1	2	1	1	1	2	1	1	1	3	4	2	3	2	4	3	3	3	4	2	3	2	4	3	3	-0.323223	0.0732233	2	2	5	59.36	dB(SPL)	54.53	dB(SPL)	11.4	s	66.74
6	5	Dreizinenhutte	Dreizinnenhutte1	6_5	2023-06-25	DZ	2	32	1	1	1	4	1	2	1	1	1	2	1	1	1	1	4	2	2	2	4	3	2	1	4	2	2	2	4	3	2	-0.457107	0.25	2	2	5	59.36	dB(SPL)	54.53	dB(SPL)	11.4	s	66.74
7	5	Dreizinenhutte	Dreizinnenhutte1	7_5	2023-06-25	DZ	2		1	1	1	4	2	2	1	1	1	2	1	1	1	3	4	3	3	2	3	4	1	3	4	3	3	2	3	4	1	0	0.396447	3	2	5	59.36	dB(SPL)	54.53	dB(SPL)	11.4	s	66.74
8	5	Dreizinenhutte	Dreizinnenhutte1	8_5	2023-06-25	DZ	1	32	1	1	1	3	1	2	1	1	1	2	1	1	1	4	2	2	4	4	2	2	3	4	2	2	4	4	2	2	3	0.28033	-0.426777	4	3	5	59.36	dB(SPL)	54.53	dB(SPL)	11.4	s	66.74
9	5	Dreizinenhutte	Dreizinnenhutte1	9_5	2023-06-25	DZ	1	30	1	2	1	4	2	2	1	1	1	2	1	1	1	4	3	4	2	3	2	3	3	4	3	4	2	3	2	3	3	0.28033	0.176777	3	3	5	59.36	dB(SPL)	54.53	dB(SPL)	11.4	s	66.74
10	5	Dreizinenhutte	Dreizinnenhutte1	10_5	2023-06-25	DZ	2	22	1	1	1	2	1	2	1	1	1	1	1	1	1	5	2	3	2	3	1	3	1	5	2	3	2	3	1	3	1	0.633883	0.176777	4	4	5	59.36	dB(SPL)	54.53	dB(SPL)	11.4	s	66.74
11	5	Dreizinenhutte	Dreizinnenhutte1	11_5	2023-06-25	DZ	1		1	2	1	5	1	2	1	1	1	2	1	1	1	5	4	4	2	2	3	3	2	5	4	4	2	2	3	3	2	0.207107	0.396447	3	1	5	59.36	dB(SPL)	54.53	dB(SPL)	11.4	s	66.74
12	5	Dreizinenhutte	Dreizinnenhutte1	12_5	2023-06-25	DZ	2	28	1	1	1	2	2	2	1	1	1	1	1	1	1	4	2	2	5	4	1	2	2	4	2	2	5	4	1	2	2	0.457107	-0.457107	4	3	5	59.36	dB(SPL)	54.53	dB(SPL)	11.4	s	66.74
13	5	Dreizinenhutte	Dreizinnenhutte1	13_5	2023-06-25	DZ	2	28	1	1	1	4	3	4	1	1	1	2	2	2	1	4	3	4	2	3	2	4	1	4	3	4	2	3	2	4	1	0.426777	0.426777	4	3	5	59.36	dB(SPL)	54.53	dB(SPL)	11.4	s	66.74
14	5	Dreizinenhutte	Dreizinnenhutte1	14_5	2023-06-25	DZ	2	27	1	1	1	4	2	2	1	1	1	2	1	1	1	3	4	4	2	2	2	4	1	3	4	4	2	2	2	4	1	0.176777	0.573223	4	4	5	59.36	dB(SPL)	54.53	dB(SPL)	11.4	s	66.74
15	5	Dreizinenhutte	Dreizinnenhutte1	15_5	2023-06-25	DZ	1	29	1	1	1	3	1	2	1	1	1	2	1	1	1	3	4	4	1	2	3	4	3	3	4	4	1	2	3	4	3	-0.0732233	0.53033	3	3	5	59.36	dB(SPL)	54.53	dB(SPL)	11.4	s	66.74
16	5	Dreizinenhutte	Dreizinnenhutte1	16_5	2023-06-25	DZ	2	58	1	1	2	3	2	2	1	1	1	2	1	1	1	4	3	3	3	3	4	3	3	4	3	3	3	3	4	3	3	0	0	3	3	3	59.36	dB(SPL)	54.53	dB(SPL)	11.4	s	66.74
17	5	Dreizinenhutte	Dreizinnenhutte1	17_5	2023-06-25	DZ	1	29	1	1	2	4	2	2	1	1	1	2	1	1	1	2	4	2	2	2	4	4	2	2	4	2	2	2	4	4	2	-0.353553	0.353553	2	2	5	59.36	dB(SPL)	54.53	dB(SPL)	11.4	s	66.74
18	5	Dreizinenhutte	Dreizinnenhutte1	18_5	2023-06-25	DZ	2	25	1	1	2	5	1	1	1	1	1	2	1	1	1	1	5	4	1	1	5	4	1	1	5	4	1	1	5	4	1	-0.487437	0.823223	2	1	4	59.36	dB(SPL)	54.53	dB(SPL)	11.4	s	66.74
19	5	Dreizinenhutte	Dreizinnenhutte1	19_5	2023-06-25	DZ	2	65	1	1	1	5	1	1	1	1	1	2	1	1	1	3	3	3	3	4	2	2	3	3	3	3	3	4	2	2	3	0.176777	-0.176777	3	3	5	59.36	dB(SPL)	54.53	dB(SPL)	11.4	s	66.74
20	5	Dreizinenhutte	Dreizinnenhutte1	20_5	2023-06-25	DZ	1	77	1	1	1	2	1	4	1	1	1	1	1	2	1	4	2	3	4	4	2	3	3	4	2	3	4	4	2	3	3	0.353553	-0.25	4	3	5	59.36	dB(SPL)	54.53	dB(SPL)	11.4	s	66.74
21	5	Dreizinenhutte	Dreizinnenhutte1	21_5	2023-06-25	DZ	1	33	1	1	1	4	2	2	1	1	1	2	1	1	1	3	3	4	3	4	2	4	2	3	3	4	3	4	2	4	2	0.323223	0.176777	3	3	5	59.36	dB(SPL)	54.53	dB(SPL)	11.4	s	66.74
22	5	Dreizinenhutte	Dreizinnenhutte1	22_5	2023-06-25	DZ	2	23	2	1	3	3	3	2	1	1	2	2	2	1	1	5	2	4	3	4	1	3	2	5	2	4	3	4	1	3	2	0.707107	0	4	4	4	59.36	dB(SPL)	54.53	dB(SPL)	11.4	s	66.74
23	5	Dreizinenhutte	Dreizinnenhutte1	23_5	2023-06-25	DZ	1	56	2	1	2	3	1	1	1	1	1	2	1	1	1	5	1	4	4	4	1	4	1	5	1	4	4	4	1	4	1	0.853553	0	4	3	5	59.36	dB(SPL)	54.53	dB(SPL)	11.4	s	66.74
24	5	Dreizinenhutte	Dreizinnenhutte1	24_5	2023-06-25	DZ	2	34	2	1	3	4	2	1	1	1	2	2	1	1	1	3	3	2	3	3	2	4	2	3	3	2	3	3	2	4	2	0.103553	0.103553	3	3	5	59.36	dB(SPL)	54.53	dB(SPL)	11.4	s	66.74
25	5	Dreizinenhutte	Dreizinnenhutte1	25_5	2023-06-25	DZ	2	57	2	1	1	4	1	2	1	1	1	2	1	1	1	2	2	2	2	2	3	3	2	2	2	2	2	2	3	3	2	-0.103553	0.103553	3	3	5	59.36	dB(SPL)	54.53	dB(SPL)	11.4	s	66.74
1	1	RivaBraies	RivaBraies1	1_1	2022-04-24	RB	4	40	1	1	1	4	3	2	3	1	1	2	2	1	2	3	4	3	1	2	4	4	1	3	4	3	1	2	4	4	1	-0.103553	0.603553	2	2	2	57.49	dB(SPL)	47.7	dB(SPL)	25.4	s	68.73
2	1	RivaBraies	RivaBraies1	2_1	2022-04-24	RB	1	26	2	1	1	5	1	2	2	1	1	2	1	1	1	2	5	2	2	2	4	3	1	2	5	2	2	2	4	3	1	-0.353553	0.396447	2	2	5	57.49	dB(SPL)	47.7	dB(SPL)	25.4	s	68.73
3	1	RivaBraies	RivaBraies1	3_1	2022-04-24	RB	2	22	1	1	1	5	2	1	2	1	1	2	1	1	1	4	2	3	2	4	2	3	2	4	2	3	2	4	2	3	2	0.426777	0.0303301	3	3	5	57.49	dB(SPL)	47.7	dB(SPL)	25.4	s	68.73
4	1	RivaBraies	RivaBraies1	4_1	2022-04-24	RB	1	35	2	1	1	3	3	3	3	1	1	2	2	2	2	4	3	3	2	3	3	3	3	4	3	3	2	3	3	3	3	0.103553	0.103553	3	3	5	57.49	dB(SPL)	47.7	dB(SPL)	25.4	s	68.73
5	1	RivaBraies	RivaBraies1	5_1	2022-04-24	RB	1	42	1	1	1	4	3	2	3	1	1	2	2	1	2	4	3	4	2	3	2	4	2	4	3	4	2	3	2	4	2	0.353553	0.353553	4	3	5	57.49	dB(SPL)	47.7	dB(SPL)	25.4	s	68.73
6	1	RivaBraies	RivaBraies1	6_1	2022-04-24	RB	2	22	2	1	1	4	1	4	2	1	1	2	1	2	1	4	2	2	3	4	2	4	1	4	2	2	3	4	2	4	1	0.426777	0.0303301	4	3	5	57.49	dB(SPL)	47.7	dB(SPL)	25.4	s	68.73
7	1	RivaBraies	RivaBraies1	7_1	2022-04-24	RB	2	22	2	1	1	4	3	2	2	1	1	2	2	1	1	4	3	4	2	4	1	4	3	4	3	4	2	4	1	4	3	0.457107	0.207107	4	4	5	57.49	dB(SPL)	47.7	dB(SPL)	25.4	s	68.73
8	1	RivaBraies	RivaBraies1	8_1	2022-04-24	RB	1	23	1	1	1	4	1	2	3	1	1	2	1	1	2	2	4	4	2	2	3	4	2	2	4	4	2	2	3	4	2	-0.103553	0.5	4	2	4	57.49	dB(SPL)	47.7	dB(SPL)	25.4	s	68.73
9	1	RivaBraies	RivaBraies1	9_1	2022-04-24	RB	1	27	1	1	1	4	2	1	4	1	1	2	1	1	2	3	3	4	4	2	3	4	3	3	3	4	4	2	3	4	3	0	0.146447	3	3	5	57.49	dB(SPL)	47.7	dB(SPL)	25.4	s	68.73
10	1	RivaBraies	RivaBraies1	10_1	2022-04-24	RB	1	19	2	1	1	4	1	3	3	1	1	2	1	2	2	2	4	3	4	2	4	3	3	2	4	3	4	2	4	3	3	-0.353553	0.0428932	3	3	3	57.49	dB(SPL)	47.7	dB(SPL)	25.4	s	68.73
11	1	RivaBraies	RivaBraies1	11_1	2022-04-24	RB	2	27	1	1	1	4	2	1	3	1	1	2	1	1	2	4	3	4	3	3	4	4	3	4	3	4	3	3	4	4	3	0.0732233	0.176777	3	3	5	57.49	dB(SPL)	47.7	dB(SPL)	25.4	s	68.73
12	1	RivaBraies	RivaBraies1	12_1	2022-04-24	RB	2	27	2	1	1	5	1	1	3	1	1	2	1	1	2	2	4	2	1	1	5	4	2	2	4	2	1	1	5	4	2	-0.53033	0.53033	2	1	5	57.49	dB(SPL)	47.7	dB(SPL)	25.4	s	68.73
13	1	RivaBraies	RivaBraies1	13_1	2022-04-24	RB	2		1	2	1	4	3	2	2	1	1	2	2	1	1	2	2	2	2	4	4	3	3	2	2	2	2	4	4	3	3	-0.133883	-0.116117	2	2	4	57.49	dB(SPL)	47.7	dB(SPL)	25.4	s	68.73
14	1	RivaBraies	RivaBraies1	14_1	2022-04-24	RB	2	27	2	1	1	5	2	1	3	1	1	2	1	1	2	2	5	1	1	1	5	3	1	2	5	1	1	1	5	3	1	-0.603553	0.5	1	1	5	57.49	dB(SPL)	47.7	dB(SPL)	25.4	s	68.73
1	1	BarcheBraies	BarcheBraies1	1_1	2022-04-24	BBR	4	40	1	2	2	4	4	2	2	1	1	2	2	1	1	2	3	3	2	2	4	3	2	2	3	3	2	2	4	3	2	-0.207107	0.25	2	2	4	53.75	dB(SPL)	47.9	dB(SPL)	11.6	s	66.05
2	1	BarcheBraies	BarcheBraies1	2_1	2022-04-24	BBR	1	26	2	1	1	3	2	2	2	1	1	2	1	1	1	4	2	2	5	4	2	2	2	4	2	2	5	4	2	2	2	0.353553	-0.457107	4	4	5	53.75	dB(SPL)	47.9	dB(SPL)	11.6	s	66.05
3	1	BarcheBraies	BarcheBraies1	3_1	2022-04-24	BBR	2	22	1	2	1	4	3	1	1	1	1	2	2	1	1	4	3	3	3	4	1	4	2	4	3	3	3	4	1	4	2	0.457107	0.103553	3	3	5	53.75	dB(SPL)	47.9	dB(SPL)	11.6	s	66.05
4	1	BarcheBraies	BarcheBraies1	4_1	2022-04-24	BBR	1	35	2	1	1	3	3	2	2	1	1	2	2	1	1	2	4	4	1	1	3	4	3	2	4	4	1	1	3	4	3	-0.25	0.603553	2	3	4	53.75	dB(SPL)	47.9	dB(SPL)	11.6	s	66.05
5	1	BarcheBraies	BarcheBraies1	5_1	2022-04-24	BBR	1	42	1	2	1	4	3	2	2	1	1	2	2	1	1	2	4	4	2	2	3	4	2	2	4	4	2	2	3	4	2	-0.103553	0.5	3	3	5	53.75	dB(SPL)	47.9	dB(SPL)	11.6	s	66.05
6	1	BarcheBraies	BarcheBraies1	6_1	2022-04-24	BBR	2	22	2	1	1	4	4	1	1	1	1	2	2	1	1	3	2	3	2	3	4	4	1	3	2	3	2	3	4	4	1	0.116117	0.28033	3	2	5	53.75	dB(SPL)	47.9	dB(SPL)	11.6	s	66.05
7	1	BarcheBraies	BarcheBraies1	7_1	2022-04-24	BBR	2	22	2	1	1	4	4	2	2	1	1	2	2	1	1	4	4	4	2	3	2	4	2	4	4	4	2	3	2	4	2	0.28033	0.426777	4	4	5	53.75	dB(SPL)	47.9	dB(SPL)	11.6	s	66.05
8	1	BarcheBraies	BarcheBraies1	8_1	2022-04-24	BBR	1	23	1	2	1	3	2	2	3	1	1	2	1	1	2	3	4	3	2	3	2	4	2	3	4	3	2	3	2	4	2	0.103553	0.353553	3	3	4	53.75	dB(SPL)	47.9	dB(SPL)	11.6	s	66.05
9	1	BarcheBraies	BarcheBraies1	9_1	2022-04-24	BBR	1	27	1	2	1	3	4	1	1	1	1	2	2	1	1	4	2	4	4	4	1	3	2	4	2	4	4	4	1	3	2	0.603553	-0.103553	4	4	5	53.75	dB(SPL)	47.9	dB(SPL)	11.6	s	66.05
10	1	BarcheBraies	BarcheBraies1	10_1	2022-04-24	BBR	1	19	2	1	1	4	5	1	3	1	1	2	2	1	2	4	3	3	3	2	3	4	3	4	3	3	3	2	3	4	3	0.0303301	0.176777	2	3	5	53.75	dB(SPL)	47.9	dB(SPL)	11.6	s	66.05
11	1	BarcheBraies	BarcheBraies1	11_1	2022-04-24	BBR	2	27	1	1	1	4	3	1	1	1	1	2	2	1	1	3	3	4	2	4	3	4	2	3	3	4	2	4	3	4	2	0.21967	0.28033	3	3	5	53.75	dB(SPL)	47.9	dB(SPL)	11.6	s	66.05
12	1	BarcheBraies	BarcheBraies1	12_1	2022-04-24	BBR	2	27	2	1	1	4	2	1	2	1	1	2	1	1	1	2	4	2	2	2	4	3	2	2	4	2	2	2	4	3	2	-0.353553	0.25	2	1	5	53.75	dB(SPL)	47.9	dB(SPL)	11.6	s	66.05
13	1	BarcheBraies	BarcheBraies1	13_1	2022-04-24	BBR	2		1	2	1	4	3	2	3	1	1	2	2	1	2	2	4	3	3	2	4	3	3	2	4	3	3	2	4	3	3	-0.353553	0.146447	4	3	5	53.75	dB(SPL)	47.9	dB(SPL)	11.6	s	66.05
14	1	BarcheBraies	BarcheBraies1	14_1	2022-04-24	BBR	2	27	2	1	1	3	3	1	2	1	1	2	2	1	1	4	3	2	3	3	3	2	2	4	3	2	3	3	3	2	2	0.103553	-0.103553	3	3	4	53.75	dB(SPL)	47.9	dB(SPL)	11.6	s	66.05
1	2	MalgaVenegia	MalgaVenegia1	1_2	2022-06-19	MV	1	28	1	2	1	4	3	1	2	1	1	2	2	1	1	3	4	3	2	2	3	4	2	3	4	3	2	2	3	4	2	-0.0732233	0.426777	3	3	4	70.04	dB(SPL)	52.46	dB(SPL)	1.19	s	86.52
2	2	MalgaVenegia	MalgaVenegia1	2_2	2022-06-19	MV	1	55	1	2	1	2	3	3	3	1	1	1	2	2	2	4	2	3	4	3	3	3	2	4	2	3	4	3	3	3	2	0.25	-0.103553	4	4	4	70.04	dB(SPL)	52.46	dB(SPL)	1.19	s	86.52
3	2	MalgaVenegia	MalgaVenegia1	3_2	2022-06-19	MV	2	56	2	2	1	4	2	1	2	1	1	2	1	1	1	2	3	3	2	2	4	4	2	2	3	3	2	2	4	4	2	-0.207107	0.353553	3	3	3	70.04	dB(SPL)	52.46	dB(SPL)	1.19	s	86.52
4	2	MalgaVenegia	MalgaVenegia1	4_2	2022-06-19	MV	1	34	1	2	1	4	4	0	3	1	1	2	2	2	2	4	2	4	3	2	2	4	2	4	2	4	3	2	2	4	2	0.353553	0.25	4	3	5	70.04	dB(SPL)	52.46	dB(SPL)	1.19	s	86.52
5	2	MalgaVenegia	MalgaVenegia1	5_2	2022-06-19	MV	1	23	1	2	2	4	3	2	2	1	1	2	2	1	1	3	4	3	2	2	4	3	3	3	4	3	2	2	4	3	3	-0.25	0.25	2	1	2	70.04	dB(SPL)	52.46	dB(SPL)	1.19	s	86.52
6	2	MalgaVenegia	MalgaVenegia1	6_2	2022-06-19	MV	2	23	1	1	1	3	4	4	3	1	1	2	2	2	2	4	2	4	3	4	2	4	2	4	2	4	3	4	2	4	2	0.5	0.103553	4	4	5	70.04	dB(SPL)	52.46	dB(SPL)	1.19	s	86.52
1	3	ParcheggioBaitaSegantini	ParcheggioBaitaSegantini2	1_3	2023-02-12	PBS2	1	34	1	1	3	4	1	2	1	1	2	2	1	1	1	2	4	2	4	3	3	3	4	2	4	2	4	3	3	3	4	-0.323223	-0.176777	2	3	5	55.5	dB(SPL)	49.74	dB(SPL)	40.5	s	63.88
2	3	ParcheggioBaitaSegantini	ParcheggioBaitaSegantini2	2_3	2023-02-12	PBS2	4		2	1	5	5	1	1	1	1	2	2	1	1	1	4	2	3	4	4	2	3	4	4	2	3	4	4	2	3	4	0.28033	-0.323223	4	5	5	55.5	dB(SPL)	49.74	dB(SPL)	40.5	s	63.88
3	3	ParcheggioBaitaSegantini	ParcheggioBaitaSegantini2	3_3	2023-02-12	PBS2	1	33	1	2	4	4	1	2	1	1	2	2	1	1	1	3	3	2	4	3	2	3	2	3	3	2	4	3	2	3	2	0.103553	-0.103553	3	2	5	55.5	dB(SPL)	49.74	dB(SPL)	40.5	s	63.88
4	3	ParcheggioBaitaSegantini	ParcheggioBaitaSegantini2	4_3	2023-02-12	PBS2	1	29	1	1	1	3	1	2	1	1	1	2	1	1	1	4	1	2	3	4	1	2	1	4	1	2	3	4	1	2	1	0.603553	-0.25	4	4	5	55.5	dB(SPL)	49.74	dB(SPL)	40.5	s	63.88
5	3	ParcheggioBaitaSegantini	ParcheggioBaitaSegantini2	5_3	2023-02-12	PBS2	1	32	1	1	3	2	1	1	1	1	2	1	1	1	1	4	1	4	4	4	1	5	1	4	1	4	4	4	1	5	1	0.75	0.103553	4	4	4	55.5	dB(SPL)	49.74	dB(SPL)	40.5	s	63.88
6	3	ParcheggioBaitaSegantini	ParcheggioBaitaSegantini2	6_3	2023-02-12	PBS2	1	25	1	1	4	3	1	1	1	1	2	2	1	1	1	3	3	3	4	3	3	3	3	3	3	3	4	3	3	3	3	0	-0.103553	3	4	5	55.5	dB(SPL)	49.74	dB(SPL)	40.5	s	63.88
7	3	ParcheggioBaitaSegantini	ParcheggioBaitaSegantini2	7_3	2023-02-12	PBS2	2	26	1	1	1	4	1	2	1	1	1	2	1	1	1	3	2	2	5	4	3	2	4	3	2	2	5	4	3	2	4	0	-0.603553	3	3	5	55.5	dB(SPL)	49.74	dB(SPL)	40.5	s	63.88
8	3	ParcheggioBaitaSegantini	ParcheggioBaitaSegantini2	8_3	2023-02-12	PBS2	1	55	2	1	3	3	1	1	1	1	2	2	1	1	1	5	1	4	4	4	1	3	1	5	1	4	4	4	1	3	1	0.853553	-0.103553	4	4	5	55.5	dB(SPL)	49.74	dB(SPL)	40.5	s	63.88
9	3	ParcheggioBaitaSegantini	ParcheggioBaitaSegantini2	9_3	2023-02-12	PBS2	2	20	2	1	2	3	1	1	1	1	1	2	1	1	1	5	2	3	4	4	1	4	1	5	2	3	4	4	1	4	1	0.707107	0	3	4	5	55.5	dB(SPL)	49.74	dB(SPL)	40.5	s	63.88
10	3	ParcheggioBaitaSegantini	ParcheggioBaitaSegantini2	10_3	2023-02-12	PBS2	2	26	1	1	4	3	1	1	1	1	2	2	1	1	1	4	2	2	2	4	1	2	4	4	2	2	2	4	1	2	4	0.31066	-0.292893	4	5	4	55.5	dB(SPL)	49.74	dB(SPL)	40.5	s	63.88
11	3	ParcheggioBaitaSegantini	ParcheggioBaitaSegantini2	11_3	2023-02-12	PBS2	1	30	1	1	3	3	1	1	1	1	2	2	1	1	1	3	2	2	3	4	2	4	2	3	2	2	3	4	2	4	2	0.25	-0.0428932	3	2	5	55.5	dB(SPL)	49.74	dB(SPL)	40.5	s	63.88
12	3	ParcheggioBaitaSegantini	ParcheggioBaitaSegantini2	12_3	2023-02-12	PBS2	1	39	1	1	4	2	1	1	1	1	2	1	1	1	1	4	3	3	4	4	1	2	4	4	3	3	4	4	1	2	4	0.31066	-0.353553	4	3	4	55.5	dB(SPL)	49.74	dB(SPL)	40.5	s	63.88
13	3	ParcheggioBaitaSegantini	ParcheggioBaitaSegantini2	13_3	2023-02-12	PBS2	2	51	2	1	3	3	1	1	1	1	2	2	1	1	1	5	2	3	3	4	1	4	3	5	2	3	3	4	1	4	3	0.56066	-0.0428932	4	4	5	55.5	dB(SPL)	49.74	dB(SPL)	40.5	s	63.88
14	3	ParcheggioBaitaSegantini	ParcheggioBaitaSegantini2	14_3	2023-02-12	PBS2	1	28	1	1	4	2	1	1	1	1	2	1	1	1	1	3	1	1	4	4	1	1	4	3	1	1	4	4	1	1	4	0.207107	-0.75	3	5	5	55.5	dB(SPL)	49.74	dB(SPL)	40.5	s	63.88
15	3	ParcheggioBaitaSegantini	ParcheggioBaitaSegantini2	15_3	2023-02-12	PBS2	2	25	1	2	5	4	1	2	1	1	2	2	1	1	1	2	4	3	5	2	3	4	3	2	4	3	5	2	3	4	3	-0.25	0.0428932	3	2	4	55.5	dB(SPL)	49.74	dB(SPL)	40.5	s	63.88
16	3	ParcheggioBaitaSegantini	ParcheggioBaitaSegantini2	16_3	2023-02-12	PBS2	2	24	1	2	3	4	1	1	1	1	2	2	1	1	1	2	5	4	2	2	2	4	2	2	5	4	2	2	2	4	2	-0.0732233	0.573223	3	2	5	55.5	dB(SPL)	49.74	dB(SPL)	40.5	s	63.88
17	3	ParcheggioBaitaSegantini	ParcheggioBaitaSegantini2	17_3	2023-02-12	PBS2	1	35	1	1	4	3	1	1	1	1	2	2	1	1	1	2	4	3	3	4	4	4	2	2	4	3	3	4	4	4	2	-0.133883	0.176777	3	2	5	55.5	dB(SPL)	49.74	dB(SPL)	40.5	s	63.88
18	3	ParcheggioBaitaSegantini	ParcheggioBaitaSegantini2	18_3	2023-02-12	PBS2	2	36	1	4	1	4	1	1	1	2	1	2	1	1	1	4	2	5	3	4	1	5	1	4	2	5	3	4	1	5	1	0.75	0.353553	4	4	5	55.5	dB(SPL)	49.74	dB(SPL)	40.5	s	63.88
1	1	Cascata	Cascata1	1_1	2022-04-24	CC	4	40	1	4	1	2	2	2	4	2	1	1	1	1	2	4	1	3	4	4	2	2	2	4	1	3	4	4	2	2	2	0.5	-0.353553	4	4	4	48.93	dB(SPL)	47.29	dB(SPL)	26.1	s	57.98
2	1	Cascata	Cascata1	2_1	2022-04-24	CC	1	26	2	1	1	3	1	1	3	1	1	2	1	1	2	4	1	2	5	5	1	2	2	4	1	2	5	5	1	2	2	0.603553	-0.603553	4	5	5	48.93	dB(SPL)	47.29	dB(SPL)	26.1	s	57.98
3	1	Cascata	Cascata1	3_1	2022-04-24	CC	2	22	1	1	2	2	2	1	5	1	1	1	1	1	2	5	1	3	3	4	1	2	2	5	1	3	3	4	1	2	2	0.707107	-0.25	4	4	5	48.93	dB(SPL)	47.29	dB(SPL)	26.1	s	57.98
4	1	Cascata	Cascata1	4_1	2022-04-24	CC	1	35	2	1	1	3	4	5	5	1	1	2	2	2	2	4	2	2	3	4	3	3	2	4	2	2	3	4	3	3	2	0.25	-0.146447	3	3	4	48.93	dB(SPL)	47.29	dB(SPL)	26.1	s	57.98
5	1	Cascata	Cascata1	5_1	2022-04-24	CC	1	42	1	2	1	3	2		4	1	1	2	1	2	2	5	2	4	2	4	1	4	2	5	2	4	2	4	1	4	2	0.707107	0.207107	5	4	5	48.93	dB(SPL)	47.29	dB(SPL)	26.1	s	57.98
6	1	Cascata	Cascata1	6_1	2022-04-24	CC	2	22	2	2	1	2	2	1	4	1	1	1	1	1	2	5	2	2	3	5	1	2	1	5	2	2	3	5	1	2	1	0.707107	-0.25	5	4	5	48.93	dB(SPL)	47.29	dB(SPL)	26.1	s	57.98
7	1	Cascata	Cascata1	7_1	2022-04-24	CC	2	22	2	1	1	2	3	4	4	1	1	1	2	2	2	5	1	5	5	5	1	2	3	5	1	5	5	5	1	2	3	0.853553	-0.457107	5	5	5	48.93	dB(SPL)	47.29	dB(SPL)	26.1	s	57.98
8	1	Cascata	Cascata1	8_1	2022-04-24	CC	1	23	1	1	1	3	2	2	4	1	1	2	1	1	2	4	2	4	2	3	2	4	2	4	2	4	2	3	2	4	2	0.426777	0.28033	4	3	4	48.93	dB(SPL)	47.29	dB(SPL)	26.1	s	57.98
9	1	Cascata	Cascata1	9_1	2022-04-24	CC	1	27	1	2	1	2	2	1	4	1	1	1	1	1	2	4	1	3	4	4	2	2	3	4	1	3	4	4	2	2	3	0.426777	-0.426777	4	4	5	48.93	dB(SPL)	47.29	dB(SPL)	26.1	s	57.98
10	1	Cascata	Cascata1	10_1	2022-04-24	CC	1	19	2	1	1	5	2	1	1	1	1	2	1	1	1	4	4	4	2	2	4	4	2	4	4	4	2	2	4	4	2	0	0.5	2	2	5	48.93	dB(SPL)	47.29	dB(SPL)	26.1	s	57.98
11	1	Cascata	Cascata1	11_1	2022-04-24	CC	2	27	1	1	1	2	2	1	4	1	1	1	1	1	2	4	2	4	3	4	1	3	1	4	2	4	3	4	1	3	1	0.676777	0.0732233	4	4	4	48.93	dB(SPL)	47.29	dB(SPL)	26.1	s	57.98
12	1	Cascata	Cascata1	12_1	2022-04-24	CC	2	27	2	2	1	2	1	2	4	1	1	1	1	1	2	4	2	3	4	4	2	2	2	4	2	3	4	4	2	2	2	0.426777	-0.28033	5	3	5	48.93	dB(SPL)	47.29	dB(SPL)	26.1	s	57.98
13	1	Cascata	Cascata1	13_1	2022-04-24	CC	2		1	2	1	2	2	4	4	1	1	1	1	2	2	5	2	3	2	4	2	3	3	5	2	3	2	4	2	3	3	0.457107	-0.0428932	4	4	5	48.93	dB(SPL)	47.29	dB(SPL)	26.1	s	57.98
14	1	Cascata	Cascata1	14_1	2022-04-24	CC	2	27	2	2	1	2	2	1	4	1	1	1	1	1	2	5	1	2	5	5	1	2	2	5	1	2	5	5	1	2	2	0.707107	-0.603553	5	5	5	48.93	dB(SPL)	47.29	dB(SPL)	26.1	s	57.98
1	4	BobBothy	BobBothy1	1_4	2023-05-28	BBT	1	29	2	1	1	1	3	2	4	1	1	1	2	1	2	4	1	3	3	5	1	3	3	4	1	3	3	5	1	3	3	0.603553	-0.292893	4	4	4	48.97	dB(SPL)	43.92	dB(SPL)	58.5	s	56.76
2	4	BobBothy	BobBothy1	2_4	2023-05-28	BBT	1	46	1	1	1		3	2	3	1	1	2	2	1	2	5	1	3	2	5	1	3	2	5	1	3	2	5	1	3	2	0.78033	-0.116117	5	5	5	48.97	dB(SPL)	43.92	dB(SPL)	58.5	s	56.76
3	4	BobBothy	BobBothy1	3_4	2023-05-28	BBT	2	29	1	1	1	1	5	2	5	1	1	1	2	1	2	5	1	3	3	5	1	2	3	5	1	3	3	5	1	2	3	0.707107	-0.396447	5	5	5	48.97	dB(SPL)	43.92	dB(SPL)	58.5	s	56.76
4	4	BobBothy	BobBothy1	4_4	2023-05-28	BBT	2	65	2	1	1	3	5		4	1	1	2	2	2	2	5	1	4	1	5	1	4	1	5	1	4	1	5	1	4	1	0.926777	0.237437	5	5	5	48.97	dB(SPL)	43.92	dB(SPL)	58.5	s	56.76
5	4	BobBothy	BobBothy1	5_4	2023-05-28	BBT	1	61	1	1	1	2	4	1	4	1	1	1	2	1	2	5	2	4	3	5	1	2	2	5	2	4	3	5	1	2	2	0.78033	-0.176777	5	5	5	48.97	dB(SPL)	43.92	dB(SPL)	58.5	s	56.76
6	4	BobBothy	BobBothy1	6_4	2023-05-28	BBT	2	28	1	1	1	2	4	2	4	1	1	1	2	1	2	5	1	4	3	3	2	3	4	5	1	4	3	3	2	3	4	0.457107	-0.146447	5	5	5	48.97	dB(SPL)	43.92	dB(SPL)	58.5	s	56.76
7	4	BobBothy	BobBothy1	7_4	2023-05-28	BBT	1	24	1	1	1	2	5	4	4	1	1	1	2	2	2	5	2	4	3	4	1	3	4	5	2	4	3	4	1	3	4	0.56066	-0.146447	5	5	5	48.97	dB(SPL)	43.92	dB(SPL)	58.5	s	56.76
8	4	BobBothy	BobBothy1	8_4	2023-05-28	BBT	2	29	2	1	1	1	5	3	4	1	1	1	2	2	2	5	1	4	3	5	1	2	3	5	1	4	3	5	1	2	3	0.78033	-0.323223	5	5	5	48.97	dB(SPL)	43.92	dB(SPL)	58.5	s	56.76
9	4	BobBothy	BobBothy1	9_4	2023-05-28	BBT	1	36	1	1	1	2	4	2	5	1	1	1	2	1	2	5	1	3	3	5	1	4	2	5	1	3	3	5	1	4	2	0.78033	-0.116117	5	5	4	48.97	dB(SPL)	43.92	dB(SPL)	58.5	s	56.76
10	4	BobBothy	BobBothy1	10_4	2023-05-28	BBT	1	64	1	1	1	2	4	2	4	1	1	1	2	1	2	5	1	4	3	4	1	3	1	5	1	4	3	4	1	3	1	0.853553	0	5	4	4	48.97	dB(SPL)	43.92	dB(SPL)	58.5	s	56.76
11	4	BobBothy	BobBothy1	11_4	2023-05-28	BBT	1	22	2	1	1	3	4	2	2	1	1	2	2	1	1	5	1	2	3	5	1	1	4	5	1	2	3	5	1	1	4	0.56066	-0.646447	4	4	4	48.97	dB(SPL)	43.92	dB(SPL)	58.5	s	56.76
12	4	BobBothy	BobBothy1	12_4	2023-05-28	BBT	1	34	1	1	1	1	5	2	5	1	1	1	2	1	2	5	1	4	3	5	1	3	2	5	1	4	3	5	1	3	2	0.853553	-0.146447	5	5	5	48.97	dB(SPL)	43.92	dB(SPL)	58.5	s	56.76
13	4	BobBothy	BobBothy1	13_4	2023-05-28	BBT	2	26	1	1	1	2	5	2	4	2	1	1	2	1	2	5	2	4	2	4	2	4	2	5	2	4	2	4	2	4	2	0.603553	0.207107	5	4	5	48.97	dB(SPL)	43.92	dB(SPL)	58.5	s	56.76
14	4	BobBothy	BobBothy1	14_4	2023-05-28	BBT	1	28	1	1	1	2	3	3	5	1	1	1	2	2	2	5	1	4	3	3	1	4	2	5	1	4	3	3	1	4	2	0.707107	0.103553	5	3	5	48.97	dB(SPL)	43.92	dB(SPL)	58.5	s	56.76
15	4	BobBothy	BobBothy1	15_4	2023-05-28	BBT	2	40	2	1	1	1	2	2	3	1	1	1	1	1	2	2	5	3	3	4	5	3	3	2	5	3	3	4	5	3	3	-0.383883	0.0732233	4	4	4	48.97	dB(SPL)	43.92	dB(SPL)	58.5	s	56.76
16	4	BobBothy	BobBothy1	16_4	2023-05-28	BBT	1	36	1	1	1	3	4	2	4	1	1	2	2	1	2	5	1	3	3	5	1	3	3	5	1	3	3	5	1	3	3	0.707107	-0.292893	5	5	4	48.97	dB(SPL)	43.92	dB(SPL)	58.5	s	56.76
17	4	BobBothy	BobBothy1	17_4	2023-05-28	BBT	1	40	2	1	1	2	3	3	4	1	1	1	2	2	2	5	1	4	2	4	1	4	2	5	1	4	2	4	1	4	2	0.78033	0.133883	5	5	5	48.97	dB(SPL)	43.92	dB(SPL)	58.5	s	56.76
18	4	BobBothy	BobBothy1	18_4	2023-05-28	BBT	1	54	2	1	1	1	5	2	4	1	1	1	2	1	2	5	2	3	3	4	1	3	2	5	2	3	3	4	1	3	2	0.633883	-0.0732233	5	5	5	48.97	dB(SPL)	43.92	dB(SPL)	58.5	s	56.76
19	4	BobBothy	BobBothy1	19_4	2023-05-28	BBT	1	49	2	1	1	2	4	3	5	1	1	1	2	2	2	5	2	5	3	5	1	3	2	5	2	5	3	5	1	3	2	0.853553	0	5	5	5	48.97	dB(SPL)	43.92	dB(SPL)	58.5	s	56.76
20	4	BobBothy	BobBothy1	20_4	2023-05-28	BBT	2	37	1	1	1	1	3	2	4	1	1	1	2	1	2	4	1	2	4	2	1	2	4	4	1	2	4	2	1	2	4	0.237437	-0.426777	4	4	4	48.97	dB(SPL)	43.92	dB(SPL)	58.5	s	56.76
21	4	BobBothy	BobBothy1	21_4	2023-05-28	BBT	1	25	1	1	1	2	4	3	4	1	1	1	2	2	2	5	1	3	5	5	1	1	1	5	1	3	5	5	1	1	1	0.853553	-0.56066	4	5	5	48.97	dB(SPL)	43.92	dB(SPL)	58.5	s	56.76
22	4	BobBothy	BobBothy1	22_4	2023-05-28	BBT	1	30	2	1	1	2	3	3	5	1	1	1	2	2	2	3	2	2	3	3	2	2	2	3	2	2	3	3	2	2	2	0.176777	-0.176777	4	2	4	48.97	dB(SPL)	43.92	dB(SPL)	58.5	s	56.76
23	4	BobBothy	BobBothy1	23_4	2023-05-28	BBT	2	65	1	1	1	1	5	1	4	1	1	1	2	1	2	5	1	4	1	5	1	4	1	5	1	4	1	5	1	4	1	0.926777	0.237437	5	5	5	48.97	dB(SPL)	43.92	dB(SPL)	58.5	s	56.76
24	4	BobBothy	BobBothy1	24_4	2023-05-28	BBT	2	24	2	1	1	2	4	2	4	1	1	1	2	1	2	5	1	3	2	5	1	3	2	5	1	3	2	5	1	3	2	0.78033	-0.116117	5	5	5	48.97	dB(SPL)	43.92	dB(SPL)	58.5	s	56.76
25	4	BobBothy	BobBothy1	25_4	2023-05-28	BBT	2	52	1	1	1	1	3	3	4	1	1	1	2	2	2	5	1	5	1	5	1	4	1	5	1	5	1	5	1	4	1	1	0.31066	5	5	5	48.97	dB(SPL)	43.92	dB(SPL)	58.5	s	56.76
1	4	BridgeLui	BridgeLui1	1_4	2023-05-28	BL	1	29	2	1	1	1	4	2	5	1	1	1	2	1	2	5	2	4	2	4	1	4	2	5	2	4	2	4	1	4	2	0.707107	0.207107	4	4	5	49.53	dB(SPL)	44.87	dB(SPL)	54.5	s	60.2
2	4	BridgeLui	BridgeLui1	2_4	2023-05-28	BL	1	46	1	1	1	2	1	2	3	1	1	1	1	1	2	5	1	3	2	5	1	3	2	5	1	3	2	5	1	3	2	0.78033	-0.116117	5	5	4	49.53	dB(SPL)	44.87	dB(SPL)	54.5	s	60.2
3	4	BridgeLui	BridgeLui1	3_4	2023-05-28	BL	2	29	1	1	1	2	3	4	4	1	1	1	2	2	2	5	1	4	3	5	1	2	4	5	1	4	3	5	1	2	4	0.707107	-0.396447	5	5	5	49.53	dB(SPL)	44.87	dB(SPL)	54.5	s	60.2
4	4	BridgeLui	BridgeLui1	4_4	2023-05-28	BL	2	65	2	1	1	2	5	3	5	1	1	1	2	2	2	5	1	4	4	5	1	3	1	5	1	4	4	5	1	3	1	0.926777	-0.176777	5	5	5	49.53	dB(SPL)	44.87	dB(SPL)	54.5	s	60.2
5	4	BridgeLui	BridgeLui1	5_4	2023-05-28	BL	1	61	1	1	1	1	3	1	4	1	1	1	2	1	2	5	2	4	4	4	2	2	2	5	2	4	4	4	2	2	2	0.603553	-0.207107	5	5	5	49.53	dB(SPL)	44.87	dB(SPL)	54.5	s	60.2
6	4	BridgeLui	BridgeLui1	6_4	2023-05-28	BL	2	28	1	1	1	1	3	3	4	1	1	1	2	2	2	5	1	2	4	5	1	2	3	5	1	2	4	5	1	2	3	0.633883	-0.573223	5	5	5	49.53	dB(SPL)	44.87	dB(SPL)	54.5	s	60.2
7	4	BridgeLui	BridgeLui1	7_4	2023-05-28	BL	1	24	1	1	1	2	4	3	5	1	1	1	2	2	2	5	3	3	3	5	1	4	4	5	3	3	3	5	1	4	4	0.487437	-0.116117	5	5	5	49.53	dB(SPL)	44.87	dB(SPL)	54.5	s	60.2
8	4	BridgeLui	BridgeLui1	8_4	2023-05-28	BL	2	29	2	1	1	1	4	4	5	1	1	1	2	2	2	5	1	4	3	5	1	3	2	5	1	4	3	5	1	3	2	0.853553	-0.146447	5	5	5	49.53	dB(SPL)	44.87	dB(SPL)	54.5	s	60.2
9	4	BridgeLui	BridgeLui1	9_4	2023-05-28	BL	1	36	1	1	1	2	3	3	5	1	1	1	2	2	2	5	2	3	2	5	1	4	2	5	2	3	2	5	1	4	2	0.707107	0.0606602	5	5	4	49.53	dB(SPL)	44.87	dB(SPL)	54.5	s	60.2
10	4	BridgeLui	BridgeLui1	10_4	2023-05-28	BL	1	64	1	1	1	1	3	4	4	1	1	1	2	2	2	5	1	4	2	4	1	3	1	5	1	4	2	4	1	3	1	0.853553	0.103553	5	4	4	49.53	dB(SPL)	44.87	dB(SPL)	54.5	s	60.2
11	4	BridgeLui	BridgeLui1	11_4	2023-05-28	BL	1	22	2	1	1	2	4	4	4	1	1	1	2	2	2	5	4	4	2	5	1	2	4	5	4	4	2	5	1	2	4	0.487437	-0.0732233	4	4	5	49.53	dB(SPL)	44.87	dB(SPL)	54.5	s	60.2
12	4	BridgeLui	BridgeLui1	12_4	2023-05-28	BL	1	34	1	1	1	1	4	3	5	1	1	1	2	2	2	5	2	4	2	5	1	3	2	5	2	4	2	5	1	3	2	0.78033	0.0303301	5	5	5	49.53	dB(SPL)	44.87	dB(SPL)	54.5	s	60.2
13	4	BridgeLui	BridgeLui1	13_4	2023-05-28	BL	2	26	1	1	1	2	4	2	4	1	1	1	2	1	2	5	2	4	2	5	1	4	2	5	2	4	2	5	1	4	2	0.78033	0.133883	5	4	5	49.53	dB(SPL)	44.87	dB(SPL)	54.5	s	60.2
14	4	BridgeLui	BridgeLui1	14_4	2023-05-28	BL	1	28	1	1	1	3	4	4	5	1	1	2	2	2	2	5	1	4	3	3	1	3	2	5	1	4	3	3	1	3	2	0.707107	0	5	5	4	49.53	dB(SPL)	44.87	dB(SPL)	54.5	s	60.2
15	4	BridgeLui	BridgeLui1	15_4	2023-05-28	BL	2	40	2	1	1	2	3	4	3	1	1	1	2	2	2	1	5	3	3	4	1	3	2	1	5	3	3	4	1	3	2	0	0.146447	4	4	4	49.53	dB(SPL)	44.87	dB(SPL)	54.5	s	60.2
16	4	BridgeLui	BridgeLui1	16_4	2023-05-28	BL	1	36	1	1	1		4	4	4	1	1	2	2	2	2																	0	0	5	5	5	49.53	dB(SPL)	44.87	dB(SPL)	54.5	s	60.2
17	4	BridgeLui	BridgeLui1	17_4	2023-05-28	BL	1	40	2	1	1	2	4	4	4	1	1	1	2	2	2	5	1	3	3	5	1	3	3	5	1	3	3	5	1	3	3	0.707107	-0.292893	5	5	5	49.53	dB(SPL)	44.87	dB(SPL)	54.5	s	60.2
18	4	BridgeLui	BridgeLui1	18_4	2023-05-28	BL	1	54	2	1	1	3	1	3	1	1	1	2	1	2	1	5	3	5	3	5	2	3	2	5	3	5	3	5	2	3	2	0.676777	0.0732233	5	5	5	49.53	dB(SPL)	44.87	dB(SPL)	54.5	s	60.2
19	4	BridgeLui	BridgeLui1	19_4	2023-05-28	BL	1	49	2	1	1	1	4	4	5	1	1	1	2	2	2	5	2	4	1	5	1	3	2	5	2	4	1	5	1	3	2	0.78033	0.133883	5	5	5	49.53	dB(SPL)	44.87	dB(SPL)	54.5	s	60.2
20	4	BridgeLui	BridgeLui1	20_4	2023-05-28	BL	2	37	1	1	1	1	3	3	4	1	1	1	2	2	2	4	1	2	2	4	1	2	4	4	1	2	2	4	1	2	4	0.383883	-0.366117	4	4	4	49.53	dB(SPL)	44.87	dB(SPL)	54.5	s	60.2
21	4	BridgeLui	BridgeLui1	21_4	2023-05-28	BL	1	25	1	1	1	1	3	4	5	1	1	1	2	2	2	5	1	4	5	5	1	1	1	5	1	4	5	5	1	1	1	0.926777	-0.487437	4	5	4	49.53	dB(SPL)	44.87	dB(SPL)	54.5	s	60.2
22	4	BridgeLui	BridgeLui1	22_4	2023-05-28	BL	1	30	2	1	1	1	4	4	5	1	1	1	2	2	2	5	1	3	4	4	1	2	4	5	1	3	4	4	1	2	4	0.56066	-0.5	4	5	4	49.53	dB(SPL)	44.87	dB(SPL)	54.5	s	60.2
23	4	BridgeLui	BridgeLui1	23_4	2023-05-28	BL	2	65	1	1	1	2	3	3	4	1	1	1	2	2	2	5	1	4	1	5	1	5	1	5	1	4	1	5	1	5	1	0.926777	0.34099	5	5	5	49.53	dB(SPL)	44.87	dB(SPL)	54.5	s	60.2
24	4	BridgeLui	BridgeLui1	24_4	2023-05-28	BL	2	24	2	1	1	1	3	2	5	1	1	1	2	1	2	5	1	4	2	5	1	4	2	5	1	4	2	5	1	4	2	0.853553	0.0606602	5	5	5	49.53	dB(SPL)	44.87	dB(SPL)	54.5	s	60.2
25	4	BridgeLui	BridgeLui1	25_4	2023-05-28	BL	2	52	1	1	1	3	3	4	4	1	1	2	2	2	2	5	1	5	1	5	1	4	2	5	1	5	1	5	1	4	2	0.926777	0.237437	5	5	5	49.53	dB(SPL)	44.87	dB(SPL)	54.5	s	60.2
1	2	MalgaVenegiotta	MalgaVenegiotta1	1_2	2022-06-19	MVT	1	28	1	1	1	2	3	1	2	1	1	1	2	1	1	4	1	3	4	4	2	4	3	4	1	3	4	4	2	4	3	0.426777	-0.21967	4	4	4	48.14	dB(SPL)	42.97	dB(SPL)	26.6	s	59.98
2	2	MalgaVenegiotta	MalgaVenegiotta1	2_2	2022-06-19	MVT	1	55	1	1	1	2	4	3	3	1	1	1	2	2	2	5	1	3	4	0	1	3	1	5	1	3	4	0	1	3	1	0.487437	0.116117	5	5	5	48.14	dB(SPL)	42.97	dB(SPL)	26.6	s	59.98
3	2	MalgaVenegiotta	MalgaVenegiotta1	3_2	2022-06-19	MVT	2	56	2	1	1	2	3	2	3	1	1	1	2	1	2	5	1	3	4	4	1	3	2	5	1	3	4	4	1	3	2	0.707107	-0.25	4	4	4	48.14	dB(SPL)	42.97	dB(SPL)	26.6	s	59.98
4	2	MalgaVenegiotta	MalgaVenegiotta1	4_2	2022-06-19	MVT	1	34	1	1	1	2	4	2	3	1	1	1	2	1	2	5	1	5	4	4	1	2	1	5	1	5	4	4	1	2	1	0.926777	-0.133883	5	4	4	48.14	dB(SPL)	42.97	dB(SPL)	26.6	s	59.98
5	2	MalgaVenegiotta	MalgaVenegiotta1	5_2	2022-06-19	MVT	1	23	1	1	1	2	4	3	3	1	1	1	2	2	2	5	2	4	3	4	2	3	2	5	2	4	3	4	2	3	2	0.603553	0	4	5	4	48.14	dB(SPL)	42.97	dB(SPL)	26.6	s	59.98
6	2	MalgaVenegiotta	MalgaVenegiotta1	6_2	2022-06-19	MVT	2	23	1	1	1	2	4	5	4	1	1	1	2	2	2	5	1	5	5	5	1	5	1	5	1	5	5	5	1	5	1	1	0	5	5	5	48.14	dB(SPL)	42.97	dB(SPL)	26.6	s	59.98
1	1	InizioForesta	InizioForesta1	1_1	2022-04-24	IF	4	40	1	1	1	3	2	2	3	1	1	2	1	1	2	4	2	3	4	4	2	3	2	4	2	3	4	4	2	3	2	0.426777	-0.176777	4	4	4	43.83	dB(SPL)	40.13	dB(SPL)	6.53	s	53.72
2	1	InizioForesta	InizioForesta1	2_1	2022-04-24	IF	1	26	2	1	1	3	2	1	3	1	1	2	1	1	2	4	1	2	4	4	1	2	2	4	1	2	4	4	1	2	2	0.53033	-0.426777	4	5	5	43.83	dB(SPL)	40.13	dB(SPL)	6.53	s	53.72
3	1	InizioForesta	InizioForesta1	3_1	2022-04-24	IF	2	22	1	1	1	2	1	1	3	1	1	1	1	1	2	5	1	3	4	5	1	2	1	5	1	3	4	5	1	2	1	0.853553	-0.353553	4	4	5	43.83	dB(SPL)	40.13	dB(SPL)	6.53	s	53.72
4	1	InizioForesta	InizioForesta1	4_1	2022-04-24	IF	1	35	2	1	1	3	4	5	5	1	1	2	2	2	2	4	2	2	3	4	3	3	2	4	2	2	3	4	3	3	2	0.25	-0.146447	3	3	4	43.83	dB(SPL)	40.13	dB(SPL)	6.53	s	53.72
5	1	InizioForesta	InizioForesta1	5_1	2022-04-24	IF	1	42	1	1	1	3	2	2	3	1	1	2	1	1	2	4	2	3	2	4	2	4	2	4	2	3	2	4	2	4	2	0.426777	0.133883	4	4	5	43.83	dB(SPL)	40.13	dB(SPL)	6.53	s	53.72
6	1	InizioForesta	InizioForesta1	6_1	2022-04-24	IF	2	22	2	1	1	2	3	3	4	1	1	1	2	2	2	5	2	2	4	4	2	2	2	5	2	2	4	4	2	2	2	0.457107	-0.353553	4	3	5	43.83	dB(SPL)	40.13	dB(SPL)	6.53	s	53.72
7	1	InizioForesta	InizioForesta1	7_1	2022-04-24	IF	2	22	2	1	1	2	3	2	3	1	1	1	2	1	2	5	2	5	4	4	1	3	2	5	2	5	4	4	1	3	2	0.78033	-0.0303301	4	5	4	43.83	dB(SPL)	40.13	dB(SPL)	6.53	s	53.72
8	1	InizioForesta	InizioForesta1	8_1	2022-04-24	IF	1	23	1	1	1	2	2	2	3	1	1	1	1	1	2	4	2	4	3	4	2	4	2	4	2	4	3	4	2	4	2	0.5	0.103553	4	3	4	43.83	dB(SPL)	40.13	dB(SPL)	6.53	s	53.72
9	1	InizioForesta	InizioForesta1	9_1	2022-04-24	IF	1	27	1	1	1	2	3	1	3	1	1	1	2	1	2	4	1	3	4	4	1	1	3	4	1	3	4	4	1	1	3	0.53033	-0.53033	4	4	4	43.83	dB(SPL)	40.13	dB(SPL)	6.53	s	53.72
10	1	InizioForesta	InizioForesta1	10_1	2022-04-24	IF	1	19	2	1	1	2	2	1	3	1	1	1	1	1	2	4	1	3	5	5	1	1	3	4	1	3	5	5	1	1	3	0.603553	-0.707107	5	5	5	43.83	dB(SPL)	40.13	dB(SPL)	6.53	s	53.72
11	1	InizioForesta	InizioForesta1	11_1	2022-04-24	IF	2	27	1	1	1	3	1	1	3	1	1	2	1	1	2	4	2	2	4	4	2	3	2	4	2	2	4	4	2	3	2	0.353553	-0.25	3	3	5	43.83	dB(SPL)	40.13	dB(SPL)	6.53	s	53.72
12	1	InizioForesta	InizioForesta1	12_1	2022-04-24	IF	2	27	2	1	1	2	2	3	4	1	1	1	1	2	2	4	2	3	4	4	2	1	2	4	2	3	4	4	2	1	2	0.426777	-0.383883	4	3	4	43.83	dB(SPL)	40.13	dB(SPL)	6.53	s	53.72
13	1	InizioForesta	InizioForesta1	13_1	2022-04-24	IF	2		1	1	1	3	3	1	3	1	1	2	2	1	2	5	2	2	4	5	2	3	2	5	2	2	4	5	2	3	2	0.53033	-0.323223	4	4	4	43.83	dB(SPL)	40.13	dB(SPL)	6.53	s	53.72
14	1	InizioForesta	InizioForesta1	14_1	2022-04-24	IF	2	27	2	1	1	2	2	1	3	1	1	1	1	1	2	5	1	3	5	5	1	2	2	5	1	3	5	5	1	2	2	0.78033	-0.53033	5	5	5	43.83	dB(SPL)	40.13	dB(SPL)	6.53	s	53.72
1	3	BelvedereSegantini	BelvedereSegantini1	1_3	2023-02-12	BS	1	34	1	2	1	2	1	3	1	1	1	1	1	2	1	5	1	3	3	5	1	3	2	5	1	3	3	5	1	3	2	0.78033	-0.21967	5	3	5	55.25	dB(SPL)	46.78	dB(SPL)	60	s	62.83
2	3	BelvedereSegantini	BelvedereSegantini1	2_3	2023-02-12	BS	4		2	4	1	3	2	2	1	2	1	2	1	1	1	4	1	2	4	5	2	4	2	4	1	2	4	5	2	4	2	0.5	-0.292893	5	5	5	55.25	dB(SPL)	46.78	dB(SPL)	60	s	62.83
3	3	BelvedereSegantini	BelvedereSegantini1	3_3	2023-02-12	BS	1	33	1	3	1	3	1	3	1	2	1	2	1	2	1	5	1	3	4	5	1	2	2	5	1	3	4	5	1	2	2	0.78033	-0.426777	4	4	5	55.25	dB(SPL)	46.78	dB(SPL)	60	s	62.83
4	3	BelvedereSegantini	BelvedereSegantini1	4_3	2023-02-12	BS	1	29	1	1	1	2	1	3	1	1	1	1	1	2	1	5	2	3	5	5	1	2	1	5	2	3	5	5	1	2	1	0.78033	-0.383883	5	4	5	55.25	dB(SPL)	46.78	dB(SPL)	60	s	62.83
5	3	BelvedereSegantini	BelvedereSegantini1	5_3	2023-02-12	BS	1	32	1	4	1	2	1	1	1	2	1	1	1	1	1	5	1	4	5	5	1	2	1	5	1	4	5	5	1	2	1	0.926777	-0.383883	5	5	5	55.25	dB(SPL)	46.78	dB(SPL)	60	s	62.83
6	3	BelvedereSegantini	BelvedereSegantini1	6_3	2023-02-12	BS	1	25	1	4	1	2	1	1	1	2	1	1	1	1	1	5	1	1	5	5	1	1	3	5	1	1	5	5	1	1	3	0.56066	-0.853553	5	5	5	55.25	dB(SPL)	46.78	dB(SPL)	60	s	62.83
7	3	BelvedereSegantini	BelvedereSegantini1	7_3	2023-02-12	BS	2	26	1	5	1	2	1	1	1	2	1	1	1	1	1	2	2	3	3	3	3	3	3	2	2	3	3	3	3	3	3	-0.0303301	-0.0732233	3	4	5	55.25	dB(SPL)	46.78	dB(SPL)	60	s	62.83
8	3	BelvedereSegantini	BelvedereSegantini1	8_3	2023-02-12	BS	1	55	2	3	5	3	4	4	5	2	2	2	2	2	2	5	1	5	2	5	1	4	2	5	1	5	2	5	1	4	2	0.926777	0.133883	5	1	5	55.25	dB(SPL)	46.78	dB(SPL)	60	s	62.83
9	3	BelvedereSegantini	BelvedereSegantini1	9_3	2023-02-12	BS	2	20	2	4	3	2	1	1	1	2	2	1	1	1	1	4	2	2	4	4	4	3	2	4	2	2	4	4	4	3	2	0.146447	-0.25	3	3	5	55.25	dB(SPL)	46.78	dB(SPL)	60	s	62.83
10	3	BelvedereSegantini	BelvedereSegantini1	10_3	2023-02-12	BS	2	26	1	3	1	2	1	1	1	2	1	1	1	1	1	5	1	3	5	5	2	2	2	5	1	3	5	5	2	2	2	0.676777	-0.53033	5	5	5	55.25	dB(SPL)	46.78	dB(SPL)	60	s	62.83
11	3	BelvedereSegantini	BelvedereSegantini1	11_3	2023-02-12	BS	1	30	1	3	1	2	2	1	1	2	1	1	1	1	1	4	2	2	4	4	2	1	4	4	2	2	4	4	2	1	4	0.207107	-0.603553	4	4	4	55.25	dB(SPL)	46.78	dB(SPL)	60	s	62.83
12	3	BelvedereSegantini	BelvedereSegantini1	12_3	2023-02-12	BS	1	39	1	2	1	2	1	1	1	1	1	1	1	1	1	3	1	3	4	5	3	2	2	3	1	3	4	5	3	2	2	0.366117	-0.426777	5	4	5	55.25	dB(SPL)	46.78	dB(SPL)	60	s	62.83
13	3	BelvedereSegantini	BelvedereSegantini1	13_3	2023-02-12	BS	2	51	2	2	1	2	1	1	1	2	1	1	1	1	1	5	1	1	5	5	1	1	1	5	1	1	5	5	1	1	1	0.707107	-0.707107	5	5	5	55.25	dB(SPL)	46.78	dB(SPL)	60	s	62.83
14	3	BelvedereSegantini	BelvedereSegantini1	14_3	2023-02-12	BS	1	28	1	2	1	2	1	3	1	1	1	1	1	2	1	5	1	1	5	5	1	1	2	5	1	1	5	5	1	1	2	0.633883	-0.78033	5	5	5	55.25	dB(SPL)	46.78	dB(SPL)	60	s	62.83
15	3	BelvedereSegantini	BelvedereSegantini1	15_3	2023-02-12	BS	2	25	1	2	2	3	1	2	1	1	1	2	1	1	1	5	1	2	5	5	1	2	1	5	1	2	5	5	1	2	1	0.78033	-0.53033	4	4	5	55.25	dB(SPL)	46.78	dB(SPL)	60	s	62.83
16	3	BelvedereSegantini	BelvedereSegantini1	16_3	2023-02-12	BS	2	24	1	3	1	3	1	1	1	2	1	2	1	1	1	5	1	2	4	5	1	2	3	5	1	2	4	5	1	2	3	0.633883	-0.573223	5	5	5	55.25	dB(SPL)	46.78	dB(SPL)	60	s	62.83
17	3	BelvedereSegantini	BelvedereSegantini1	17_3	2023-02-12	BS	1	35	1	4	1	4	1	3	1	2	1	2	1	2	1	4	2	2	4	4	2	2	2	4	2	2	4	4	2	2	2	0.353553	-0.353553	4	3	5	55.25	dB(SPL)	46.78	dB(SPL)	60	s	62.83
18	3	BelvedereSegantini	BelvedereSegantini1	18_3	2023-02-12	BS	2	36	1	4	1	3	2	1	1	2	1	2	1	1	1	5	1	4	5	4	1	4	1	5	1	4	5	4	1	4	1	0.853553	-0.103553	5	5	5	55.25	dB(SPL)	46.78	dB(SPL)	60	s	62.83
1	4	LinnOfDeeBog	LinnOfDeeBog2	1_4	2023-05-28	LB	1	29	2	1	1	2	5	1	3	1	1	1	2	1	2	4	1	4	2	4	1	4	2	4	1	4	2	4	1	4	2	0.676777	0.133883	5	4	4	46.4	dB(SPL)	37.08	dB(SPL)	9.34	s	56
2	4	LinnOfDeeBog	LinnOfDeeBog2	2_4	2023-05-28	LB	1	46	1	1	1	3	4	3	1	1	1	2	2	2	1	3	1	2	3	4	1	2	2	3	1	2	3	4	1	2	2	0.426777	-0.323223	5	4	5	46.4	dB(SPL)	37.08	dB(SPL)	9.34	s	56
3	4	LinnOfDeeBog	LinnOfDeeBog2	3_4	2023-05-28	LB	2	29	1			3	5	3	2	2	2	2	2	2	1	5	1	4	2	3	3	4	1	5	1	4	2	3	3	4	1	0.573223	0.28033	4	5	4	46.4	dB(SPL)	37.08	dB(SPL)	9.34	s	56
4	4	LinnOfDeeBog	LinnOfDeeBog2	4_4	2023-05-28	LB	2	65	2	1	1	3	4	1	1	1	1	2	2	1	1	5	1	3	2	5	1	4	1	5	1	3	2	5	1	4	1	0.853553	0.0606602	5	5	5	46.4	dB(SPL)	37.08	dB(SPL)	9.34	s	56
5	4	LinnOfDeeBog	LinnOfDeeBog2	5_4	2023-05-28	LB	1	61	1	1	1	2	4	1	2	1	1	1	2	1	1	5	2	3	4	4	2	2	2	5	2	3	4	4	2	2	2	0.53033	-0.28033	5	5	5	46.4	dB(SPL)	37.08	dB(SPL)	9.34	s	56
6	4	LinnOfDeeBog	LinnOfDeeBog2	6_4	2023-05-28	LB	2	28	1	1	1	2	4	2	2	1	1	1	2	1	1	5	3	5	3	4	2	4	1	5	3	5	3	4	2	4	1	0.676777	0.323223	5	5	5	46.4	dB(SPL)	37.08	dB(SPL)	9.34	s	56
7	4	LinnOfDeeBog	LinnOfDeeBog2	7_4	2023-05-28	LB	1	24	1	1	1	4	4	2	4	1	1	2	2	1	2	5	2	4	2	4	2	3	3	5	2	4	2	4	2	3	3	0.53033	0.0303301	5	5	5	46.4	dB(SPL)	37.08	dB(SPL)	9.34	s	56
8	4	LinnOfDeeBog	LinnOfDeeBog2	8_4	2023-05-28	LB	2	29	2	1	1	2	4	3	1	1	1	1	2	2	1	5	1	4	3	5	1	4	2	5	1	4	3	5	1	4	2	0.853553	-0.0428932	5	4	5	46.4	dB(SPL)	37.08	dB(SPL)	9.34	s	56
9	4	LinnOfDeeBog	LinnOfDeeBog2	9_4	2023-05-28	LB	1	36	1	1	1	3	5	3	1	1	1	2	2	2	1	4	2	3	2	4	1	4	2	4	2	3	2	4	1	4	2	0.53033	0.133883	4	5	4	46.4	dB(SPL)	37.08	dB(SPL)	9.34	s	56
10	4	LinnOfDeeBog	LinnOfDeeBog2	10_4	2023-05-28	LB	1	64	1	1	1	3	3	3	2	1	1	2	2	2	1	4	1	2	3	4	1	2	2	4	1	2	3	4	1	2	2	0.53033	-0.323223	4	4	5	46.4	dB(SPL)	37.08	dB(SPL)	9.34	s	56
11	4	LinnOfDeeBog	LinnOfDeeBog2	11_4	2023-05-28	LB	1	22	2	1	1	4	4	2	2	1	1	2	2	1	1	5	3	4	3	5	1	3	2	5	3	4	3	5	1	3	2	0.707107	0	4	4	5	46.4	dB(SPL)	37.08	dB(SPL)	9.34	s	56
12	4	LinnOfDeeBog	LinnOfDeeBog2	12_4	2023-05-28	LB	1	34	1	1	1	2	5	2	1	1	1	1	2	1	1	5	1	4	1	5	2	4	2	5	1	4	1	5	2	4	2	0.75	0.164214	5	5	5	46.4	dB(SPL)	37.08	dB(SPL)	9.34	s	56
13	4	LinnOfDeeBog	LinnOfDeeBog2	13_4	2023-05-28	LB	2	26	1	1	1	3	4	2	2	1	1	2	2	1	1	5	3	5	1	4	2	4	1	5	3	5	1	4	2	4	1	0.676777	0.53033	4	4	5	46.4	dB(SPL)	37.08	dB(SPL)	9.34	s	56
14	4	LinnOfDeeBog	LinnOfDeeBog2	14_4	2023-05-28	LB	1	28	1	1	1	3	5	3	2	1	1	2	2	2	1	5	1	2	3	5	1	3	2	5	1	2	3	5	1	3	2	0.707107	-0.292893	5	5	5	46.4	dB(SPL)	37.08	dB(SPL)	9.34	s	56
15	4	LinnOfDeeBog	LinnOfDeeBog2	15_4	2023-05-28	LB	2	40	2	1	1	2	3	3	1	1	1	1	2	2	1	4	1	3	3	4	1	3	3	4	1	3	3	4	1	3	3	0.53033	-0.21967	4	4	4	46.4	dB(SPL)	37.08	dB(SPL)	9.34	s	56
16	4	LinnOfDeeBog	LinnOfDeeBog2	16_4	2023-05-28	LB	1	36	1	1	1	3	4	3	1	1	1	2	2	2	1	4	2	3	3	5	1	3	3	4	2	3	3	5	1	3	3	0.53033	-0.21967	4	4	5	46.4	dB(SPL)	37.08	dB(SPL)	9.34	s	56
17	4	LinnOfDeeBog	LinnOfDeeBog2	17_4	2023-05-28	LB	1	40	2	1	1	3	4	3	2	1	1	2	2	2	1	4	3	3	2	3	4	4	1	4	3	3	2	3	4	4	1	0.146447	0.353553	3	3	4	46.4	dB(SPL)	37.08	dB(SPL)	9.34	s	56
18	4	LinnOfDeeBog	LinnOfDeeBog2	18_4	2023-05-28	LB	1	54	2	1	1	3	5	3	2	1	1	2	2	2	1	5	2	3	2	4	1	4	1	5	2	3	2	4	1	4	1	0.707107	0.207107	5	4	5	46.4	dB(SPL)	37.08	dB(SPL)	9.34	s	56
19	4	LinnOfDeeBog	LinnOfDeeBog2	19_4	2023-05-28	LB	1	49	2	1	1	3	5	2	2	1	1	2	2	1	1	4	2	3	3	4	2	3	3	4	2	3	3	4	2	3	3	0.353553	-0.146447	4	4	4	46.4	dB(SPL)	37.08	dB(SPL)	9.34	s	56
20	4	LinnOfDeeBog	LinnOfDeeBog2	20_4	2023-05-28	LB	2	37	1	1	1	2	4	3	2	1	1	1	2	2	1	5	1	4	2	4	1	4	2	5	1	4	2	4	1	4	2	0.78033	0.133883	4	4	4	46.4	dB(SPL)	37.08	dB(SPL)	9.34	s	56
21	4	LinnOfDeeBog	LinnOfDeeBog2	21_4	2023-05-28	LB	1	25	1	1	1	2	5	3	1	1	1	1	2	2	1	5	1	3	4	5	1	1	1	5	1	3	4	5	1	1	1	0.853553	-0.457107	4	5	4	46.4	dB(SPL)	37.08	dB(SPL)	9.34	s	56
22	4	LinnOfDeeBog	LinnOfDeeBog2	22_4	2023-05-28	LB	1	30	2	1	1	3	5	4	1	1	1	2	2	2	1	4	4	3	3	4	3	4	2	4	4	3	3	4	3	4	2	0.176777	0.176777	3	3	4	46.4	dB(SPL)	37.08	dB(SPL)	9.34	s	56
23	4	LinnOfDeeBog	LinnOfDeeBog2	23_4	2023-05-28	LB	2	65	1	1	1	2	3	2	1	1	1	1	2	1	1	5	1	5	3	5	1	3	2	5	1	5	3	5	1	3	2	0.926777	-0.0732233	5	5	5	46.4	dB(SPL)	37.08	dB(SPL)	9.34	s	56
24	4	LinnOfDeeBog	LinnOfDeeBog2	24_4	2023-05-28	LB	2	24	2	1	1	2	5	1	2	1	1	1	2	1	1	4	1	5	1	4	2	5	1	4	1	5	1	4	2	5	1	0.71967	0.487437	4	4	5	46.4	dB(SPL)	37.08	dB(SPL)	9.34	s	56
25	4	LinnOfDeeBog	LinnOfDeeBog2	25_4	2023-05-28	LB	2	52	1	1	1	3	4	3	2	1	1	2	2	2	1	5	1	5	2	5	1	3	2	5	1	5	2	5	1	3	2	0.926777	0.0303301	5	5	5	46.4	dB(SPL)	37.08	dB(SPL)	9.34	s	56
1	1	SentieroMalgaForesta	SentieroMalgaForest1	1_1	2022-04-24	SMF	4	40	1	1	1	1	4	3	3	1	1	1	2	2	2	5	1	3	5	5	1	3	2	5	1	3	5	5	1	3	2	0.78033	-0.426777	5	5	4	43.53	dB(SPL)	36.65	dB(SPL)	40.2	s	55.05
2	1	SentieroMalgaForesta	SentieroMalgaForest1	2_1	2022-04-24	SMF	1	26	2	1	1	1	3	3	3	1	1	1	2	2	2	5	2	3	5	5	1	3	2	5	2	3	5	5	1	3	2	0.707107	-0.353553	5	5	4	43.53	dB(SPL)	36.65	dB(SPL)	40.2	s	55.05
3	1	SentieroMalgaForesta	SentieroMalgaForest1	3_1	2022-04-24	SMF	2	22	1	1	1	1	5	1	2	1	1	1	2	1	1	5	1	3	3	5	1	3	1	5	1	3	3	5	1	3	1	0.853553	-0.146447	5	5	5	43.53	dB(SPL)	36.65	dB(SPL)	40.2	s	55.05
4	1	SentieroMalgaForesta	SentieroMalgaForest1	4_1	2022-04-24	SMF	1	35	2	1	1	1	4	4	5	1	1	1	2	2	2	5	1	2	5	5	1	2	3	5	1	2	5	5	1	2	3	0.633883	-0.676777	4	5	4	43.53	dB(SPL)	36.65	dB(SPL)	40.2	s	55.05
5	1	SentieroMalgaForesta	SentieroMalgaForest1	5_1	2022-04-24	SMF	1	42	1	1	1	2	3	2	3	1	1	1	2	1	2	5	1	3	4	5	1	4	2	5	1	3	4	5	1	4	2	0.78033	-0.21967	5	4	5	43.53	dB(SPL)	36.65	dB(SPL)	40.2	s	55.05
6	1	SentieroMalgaForesta	SentieroMalgaForest1	6_1	2022-04-24	SMF	2	22	2	1	1	1	4	4	3	1	1	1	2	2	2	5	1	1	5	5	1	3	2	5	1	1	5	5	1	3	2	0.633883	-0.573223	5	4	5	43.53	dB(SPL)	36.65	dB(SPL)	40.2	s	55.05
7	1	SentieroMalgaForesta	SentieroMalgaForest1	7_1	2022-04-24	SMF	2	22	2	1	1	1	4	4	2	1	1	1	2	2	1	5	2	4	4	4	2	2	3	5	2	4	4	4	2	2	3	0.53033	-0.28033	5	5	5	43.53	dB(SPL)	36.65	dB(SPL)	40.2	s	55.05
8	1	SentieroMalgaForesta	SentieroMalgaForest1	8_1	2022-04-24	SMF	1	23	1	1	1	2	3	2	3	1	1	1	2	1	2	5	1	3	3	4	2	3	2	5	1	3	3	4	2	3	2	0.603553	-0.146447	5	4	5	43.53	dB(SPL)	36.65	dB(SPL)	40.2	s	55.05
9	1	SentieroMalgaForesta	SentieroMalgaForest1	9_1	2022-04-24	SMF	1	27	1	2	1	1	3	1	3	1	1	1	2	1	2	5	1	4	4	5	1	1	2	5	1	4	4	5	1	1	2	0.853553	-0.457107	5	5	4	43.53	dB(SPL)	36.65	dB(SPL)	40.2	s	55.05
10	1	SentieroMalgaForesta	SentieroMalgaForest1	10_1	2022-04-24	SMF	1	19	2	1	1	1	4	3	1	1	1	1	2	2	1	5	1	3	5	5	1	2	1	5	1	3	5	5	1	2	1	0.853553	-0.457107	4	4	5	43.53	dB(SPL)	36.65	dB(SPL)	40.2	s	55.05
11	1	SentieroMalgaForesta	SentieroMalgaForest1	11_1	2022-04-24	SMF	2	27	1	1	1	1	4	4	3	1	1	1	2	2	2	5	1	2	4	5	1	2	2	5	1	2	4	5	1	2	2	0.707107	-0.5	4	4	4	43.53	dB(SPL)	36.65	dB(SPL)	40.2	s	55.05
12	1	SentieroMalgaForesta	SentieroMalgaForest1	12_1	2022-04-24	SMF	2	27	2	1	1	2	5	2	3	1	1	1	2	1	2	5	1	4	3	5	1	2	1	5	1	4	3	5	1	2	1	0.926777	-0.176777	5	4	4	43.53	dB(SPL)	36.65	dB(SPL)	40.2	s	55.05
13	1	SentieroMalgaForesta	SentieroMalgaForest1	13_1	2022-04-24	SMF	2		1	1	1	2	3	3	2	1	1	1	2	2	1	5	2	2	5	5	2	2	2	5	2	2	5	5	2	2	2	0.53033	-0.53033	5	5	5	43.53	dB(SPL)	36.65	dB(SPL)	40.2	s	55.05
14	1	SentieroMalgaForesta	SentieroMalgaForest1	14_1	2022-04-24	SMF	2	27	2	1	1	1	4	1	4	1	1	1	2	1	2	5	1	3	5	5	1	2	2	5	1	3	5	5	1	2	2	0.78033	-0.53033	5	5	5	43.53	dB(SPL)	36.65	dB(SPL)	40.2	s	55.05
1	1	MalgaForesta	MalgaForest1	1_1	2022-04-24	MF	4	40	1	1	1	2	3	3	1	1	1	1	2	2	1	4	1	3	4	4	1	3	2	4	1	3	4	4	1	3	2	0.603553	-0.25	4	4	4	40.44	dB(SPL)	35.94	dB(SPL)	34.9	s	52.11
2	1	MalgaForesta	MalgaForest1	2_1	2022-04-24	MF	1	26	2	1	1	2	2	3	3	1	1	1	1	2	2	4	1	2	4	5	1	3	2	4	1	2	4	5	1	3	2	0.603553	-0.396447	4	4	4	40.44	dB(SPL)	35.94	dB(SPL)	34.9	s	52.11
3	1	MalgaForesta	MalgaForest1	3_1	2022-04-24	MF	2	22	1	1	1	1	3	1	2	1	1	1	2	1	1	5	1	3	3	5	1	3	3	5	1	3	3	5	1	3	3	0.707107	-0.292893	5	5	5	40.44	dB(SPL)	35.94	dB(SPL)	34.9	s	52.11
4	1	MalgaForesta	MalgaForest1	4_1	2022-04-24	MF	1	35	2	1	1	1	5	4	5	1	1	1	2	2	2	5	2	2	5	5	1	1	4	5	2	2	5	5	1	1	4	0.487437	-0.78033	5	4	3	40.44	dB(SPL)	35.94	dB(SPL)	34.9	s	52.11
5	1	MalgaForesta	MalgaForest1	5_1	2022-04-24	MF	1	42	1	1	1	2	3	2	3	1	1	1	2	1	2	5	1	3	3	5	1	3	2	5	1	3	3	5	1	3	2	0.78033	-0.21967	5	5	5	40.44	dB(SPL)	35.94	dB(SPL)	34.9	s	52.11
6	1	MalgaForesta	MalgaForest1	6_1	2022-04-24	MF	2	22	2	1	1	1	3	1	1	1	1	1	2	1	1	4	1	1	5	5	1	1	1	4	1	1	5	5	1	1	1	0.603553	-0.707107	3	5	4	40.44	dB(SPL)	35.94	dB(SPL)	34.9	s	52.11
7	1	MalgaForesta	MalgaForest1	7_1	2022-04-24	MF	2	22	2	1	1	2	3	2	2	1	1	1	2	1	1	5	1	4	4	4	1	3	4	5	1	4	4	4	1	3	4	0.633883	-0.323223	4	4	4	40.44	dB(SPL)	35.94	dB(SPL)	34.9	s	52.11
8	1	MalgaForesta	MalgaForest1	8_1	2022-04-24	MF	1	23	1	1	1	1	2	2	2	1	1	1	1	1	1	4	2	4	4	5	2	4	2	4	2	4	4	5	2	4	2	0.573223	-0.0732233	4	4	4	40.44	dB(SPL)	35.94	dB(SPL)	34.9	s	52.11
9	1	MalgaForesta	MalgaForest1	9_1	2022-04-24	MF	1	27	1	1	1	1	4	3	2	1	1	1	2	2	1	5	1	3	5	5	1	2	2	5	1	3	5	5	1	2	2	0.78033	-0.53033	5	5	4	40.44	dB(SPL)	35.94	dB(SPL)	34.9	s	52.11
10	1	MalgaForesta	MalgaForest1	10_1	2022-04-24	MF	1	19	2	1	1	1	3	1	5	1	1	1	2	1	2	4	1	2	4	5	3	1	2	4	1	2	4	5	3	1	2	0.396447	-0.603553	4	4	4	40.44	dB(SPL)	35.94	dB(SPL)	34.9	s	52.11
11	1	MalgaForesta	MalgaForest1	11_1	2022-04-24	MF	2	27	1	1	1	1	4	2	3	1	1	1	2	1	2	4	1	2	4	5	1	2	2	4	1	2	4	5	1	2	2	0.603553	-0.5	5	5	4	40.44	dB(SPL)	35.94	dB(SPL)	34.9	s	52.11
12	1	MalgaForesta	MalgaForest1	12_1	2022-04-24	MF	2	27	2	1	1	2	3	3	4	1	1	1	2	2	2	5	2	2	4	4	2	3	3	5	2	2	4	4	2	3	3	0.383883	-0.323223	4	4	4	40.44	dB(SPL)	35.94	dB(SPL)	34.9	s	52.11
13	1	MalgaForesta	MalgaForest1	13_1	2022-04-24	MF	2		1	1	1	1	2	1	2	1	1	1	1	1	1	5	1	2	5	5	2	3	3	5	1	2	5	5	2	3	3	0.53033	-0.573223	5	5	5	40.44	dB(SPL)	35.94	dB(SPL)	34.9	s	52.11
14	1	MalgaForesta	MalgaForest1	14_1	2022-04-24	MF	2	27	2	1	1	1	3	1	3	1	1	1	2	1	2	5	1	2	4	5	1	2	2	5	1	2	4	5	1	2	2	0.707107	-0.5	5	5	5	40.44	dB(SPL)	35.94	dB(SPL)	34.9	s	52.11
1	4	CFPass	CFPass1	1_4	2023-05-28	CFP	1	29	2	1	1	1	2	1	3	1	1	1	1	1	2	3	1	2	4	5	1	2	3	3	1	2	4	5	1	2	3	0.426777	-0.573223	3	5	3	39.53	dB(SPL)	36.35	dB(SPL)	8.79	s	47.77
2	4	CFPass	CFPass1	2_4	2023-05-28	CFP	1	46	1	1	1	1	2	2	3	1	1	1	1	1	2	5	1	2	3	5	1	2	3	5	1	2	3	5	1	2	3	0.633883	-0.46967	4	4	5	39.53	dB(SPL)	36.35	dB(SPL)	8.79	s	47.77
3	4	CFPass	CFPass1	3_4	2023-05-28	CFP	2	29	1	1	1	2	2	1	3	1	1	1	1	1	2	5	1	2	3	5	1	1	3	5	1	2	3	5	1	1	3	0.633883	-0.573223	5	5	4	39.53	dB(SPL)	36.35	dB(SPL)	8.79	s	47.77
4	4	CFPass	CFPass1	4_4	2023-05-28	CFP	2	65	2	1	1	2	2	1	5	1	1	1	1	1	2	5	1	3	2	5	1	4	1	5	1	3	2	5	1	4	1	0.853553	0.0606602	5	5	5	39.53	dB(SPL)	36.35	dB(SPL)	8.79	s	47.77
5	4	CFPass	CFPass1	5_4	2023-05-28	CFP	1	61	1	1	1	1	2	1	3	1	1	1	1	1	2	5	1	2	4	5	1	2	2	5	1	2	4	5	1	2	2	0.707107	-0.5	5	5	5	39.53	dB(SPL)	36.35	dB(SPL)	8.79	s	47.77
6	4	CFPass	CFPass1	6_4	2023-05-28	CFP	2	28	1	1	1	2	2	1	2	1	1	1	1	1	1	5	1	1	5	5	1	1	4	5	1	1	5	5	1	1	4	0.487437	-0.926777	5	5	3	39.53	dB(SPL)	36.35	dB(SPL)	8.79	s	47.77
7	4	CFPass	CFPass1	7_4	2023-05-28	CFP	1	24	1	1	1	1	2	5	1	1	1	1	1	2	1	5	1	1	4	5	2	2	5	5	1	1	4	5	2	2	5	0.31066	-0.792893	5	5	5	39.53	dB(SPL)	36.35	dB(SPL)	8.79	s	47.77
8	4	CFPass	CFPass1	8_4	2023-05-28	CFP	2	29	2	1	1	1	2	3	4	1	1	1	1	2	2	5	1	2	3	5	1	2	4	5	1	2	3	5	1	2	4	0.56066	-0.542893	4	5	5	39.53	dB(SPL)	36.35	dB(SPL)	8.79	s	47.77
9	4	CFPass	CFPass1	9_4	2023-05-28	CFP	1	36	1	1	1	2	2	1	5	1	1	1	1	1	2	5	1	2	4	5	1	3	2	5	1	2	4	5	1	3	2	0.707107	-0.396447	5	5	4	39.53	dB(SPL)	36.35	dB(SPL)	8.79	s	47.77
10	4	CFPass	CFPass1	10_4	2023-05-28	CFP	1	64	1	1	1	1	2	3	1	1	1	1	1	2	1	4	1	1	4	5	1	1	2	4	1	1	4	5	1	1	2	0.53033	-0.676777	5	4	5	39.53	dB(SPL)	36.35	dB(SPL)	8.79	s	47.77
11	4	CFPass	CFPass1	11_4	2023-05-28	CFP	1	22	2	1	1	1	2	2	4	1	1	1	1	1	2	4	1	2	5	3	1	1	3	4	1	2	5	3	1	1	3	0.383883	-0.633883	4	4	4	39.53	dB(SPL)	36.35	dB(SPL)	8.79	s	47.77
12	4	CFPass	CFPass1	12_4	2023-05-28	CFP	1	34	1	1	1	1	2	1	3	1	1	1	1	1	2	4	1	2	2	4	2	2	3	4	1	2	2	4	2	2	3	0.353553	-0.292893	4	4	4	39.53	dB(SPL)	36.35	dB(SPL)	8.79	s	47.77
13	4	CFPass	CFPass1	13_4	2023-05-28	CFP	2	26	1	1	1	2	2	1	3	1	1	1	1	1	2	5	1	2	2	5	1	2	4	5	1	2	2	5	1	2	4	0.56066	-0.43934	4	4	5	39.53	dB(SPL)	36.35	dB(SPL)	8.79	s	47.77
14	4	CFPass	CFPass1	14_4	2023-05-28	CFP	1	28	1	1	1	2	1	2	3	1	1	1	1	1	2	3	1	1	5	5	2	5	3	3	1	1	5	5	2	5	3	0.25	-0.43934	4	5	4	39.53	dB(SPL)	36.35	dB(SPL)	8.79	s	47.77
15	4	CFPass	CFPass1	15_4	2023-05-28	CFP	2	40	2	1	1	2	2	2	2	1	1	1	1	1	1	4	1	2	3	4	1	3	3	4	1	2	3	4	1	3	3	0.457107	-0.292893	4	4	4	39.53	dB(SPL)	36.35	dB(SPL)	8.79	s	47.77
16	4	CFPass	CFPass1	16_4	2023-05-28	CFP	1	36	1	1	1	1	3	2	4	1	1	1	2	1	2	5	1	1	4	4	2	4	4	5	1	1	4	4	2	4	4	0.31066	-0.43934	3	4	4	39.53	dB(SPL)	36.35	dB(SPL)	8.79	s	47.77
17	4	CFPass	CFPass1	17_4	2023-05-28	CFP	1	40	2	1	1	1	2	2	2	1	1	1	1	1	1	3	1	1	4	4	4	2	4	3	1	1	4	4	4	2	4	-0.103553	-0.646447	3	4	3	39.53	dB(SPL)	36.35	dB(SPL)	8.79	s	47.77
18	4	CFPass	CFPass1	18_4	2023-05-28	CFP	1	54	2	1	1	1	2	3	1	1	1	1	1	2	1	5	2	3	1	4	2	3	1	5	2	3	1	4	2	3	1	0.603553	0.207107	5	5	5	39.53	dB(SPL)	36.35	dB(SPL)	8.79	s	47.77
19	4	CFPass	CFPass1	19_4	2023-05-28	CFP	1	49	2	1	1	1	2	1	5	1	1	1	1	1	2	5	1	1	5	5	1	1	3	5	1	1	5	5	1	1	3	0.56066	-0.853553	5	5	5	39.53	dB(SPL)	36.35	dB(SPL)	8.79	s	47.77
20	4	CFPass	CFPass1	20_4	2023-05-28	CFP	2	37	1	1	1	1	2	1	1	1	1	1	1	1	1	3	1	1	2	4	2	1	5	3	1	1	2	4	2	1	5	0.0303301	-0.616117	3	4	3	39.53	dB(SPL)	36.35	dB(SPL)	8.79	s	47.77
21	4	CFPass	CFPass1	21_4	2023-05-28	CFP	1	25	1	1	1	2	2	1	3	1	1	1	1	1	2	5	1	2	2	5	1	3	1	5	1	2	2	5	1	3	1	0.78033	-0.116117	5	5	5	39.53	dB(SPL)	36.35	dB(SPL)	8.79	s	47.77
22	4	CFPass	CFPass1	22_4	2023-05-28	CFP	1	30	2	1	1	1	2	1	3	1	1	1	1	1	2	5	1	1	5	3	1	1	3	5	1	1	5	3	1	1	3	0.414214	-0.707107	3	4	3	39.53	dB(SPL)	36.35	dB(SPL)	8.79	s	47.77
23	4	CFPass	CFPass1	23_4	2023-05-28	CFP	2	65	1	1	1	2	2	1	4	1	1	1	1	1	2	5	1	4	3	5	1	2	1	5	1	4	3	5	1	2	1	0.926777	-0.176777	5	5	5	39.53	dB(SPL)	36.35	dB(SPL)	8.79	s	47.77
24	4	CFPass	CFPass1	24_4	2023-05-28	CFP	2	24	2	1	1	1	2	1	5	1	1	1	1	1	2	5	1	4	1	5	1	4	2	5	1	4	1	5	1	4	2	0.853553	0.164214	5	5	5	39.53	dB(SPL)	36.35	dB(SPL)	8.79	s	47.77
25	4	CFPass	CFPass1	25_4	2023-05-28	CFP	2	52	1	1	1	1	3	2	1	1	1	1	2	1	1	4	1	3	4	5	1	4	3	4	1	3	4	5	1	4	3	0.603553	-0.292893	4	4	4	39.53	dB(SPL)	36.35	dB(SPL)	8.79	s	47.77
1	4	LinnOfDeeForrest	LinnOfDeeForrest2	1_4	2023-05-28	LF	1	29	2	2	1	2	2	4	4	1	1	1	1	2	2	5	1	3	2	5	1	3	2	5	1	3	2	5	1	3	2	0.78033	-0.116117	4	5	5	46.83	dB(SPL)	38.86	dB(SPL)	50	s	59.09
2	4	LinnOfDeeForrest	LinnOfDeeForrest2	2_4	2023-05-28	LF	1	46	1	1	1	2	1	3	1	1	1	1	1	2	1	5	1	2	2	5	1	3	2	5	1	2	2	5	1	3	2	0.707107	-0.18934	4	4	4	46.83	dB(SPL)	38.86	dB(SPL)	50	s	59.09
3	4	LinnOfDeeForrest	LinnOfDeeForrest2	3_4	2023-05-28	LF	2	29	1	2	1	2	4	4	1	1	1	1	2	2	1	5	1	5	3	5	1	3	2	5	1	5	3	5	1	3	2	0.926777	-0.0732233	5	5	5	46.83	dB(SPL)	38.86	dB(SPL)	50	s	59.09
4	4	LinnOfDeeForrest	LinnOfDeeForrest2	4_4	2023-05-28	LF	2	65	2	1	1	2	4	3	3	1	1	1	2	2	2	5	1	3	1	5	1	4	2	5	1	3	1	5	1	4	2	0.78033	0.0909903	5	5	5	46.83	dB(SPL)	38.86	dB(SPL)	50	s	59.09
5	4	LinnOfDeeForrest	LinnOfDeeForrest2	5_4	2023-05-28	LF	1	61	1	1	1	1	4	2	2	1	1	1	2	1	1	5	3	4	2	4	1	4	2	5	3	4	2	4	1	4	2	0.633883	0.28033	5	5	5	46.83	dB(SPL)	38.86	dB(SPL)	50	s	59.09
6	4	LinnOfDeeForrest	LinnOfDeeForrest2	6_4	2023-05-28	LF	2	28	1	1	1	2	4	3	2	1	1	1	2	2	1	5	3	4	2	5	1	3	2	5	3	4	2	5	1	3	2	0.707107	0.103553	5	5	4	46.83	dB(SPL)	38.86	dB(SPL)	50	s	59.09
7	4	LinnOfDeeForrest	LinnOfDeeForrest2	7_4	2023-05-28	LF	1	24	1	1	1		5	3	3	1	1	2	2	2	2	5	1	3	3	5	1	3	3	5	1	3	3	5	1	3	3	0.707107	-0.292893	5	5	5	46.83	dB(SPL)	38.86	dB(SPL)	50	s	59.09
8	4	LinnOfDeeForrest	LinnOfDeeForrest2	8_4	2023-05-28	LF	2	29	2	2	1	1	5	4	2	1	1	1	2	2	1	5	1	3	3	5	1	2	2	5	1	3	3	5	1	2	2	0.78033	-0.323223	5	5	5	46.83	dB(SPL)	38.86	dB(SPL)	50	s	59.09
9	4	LinnOfDeeForrest	LinnOfDeeForrest2	9_4	2023-05-28	LF	1	36	1	1	1	2	4	2	2	1	1	1	2	1	1	5	1	2	4	5	1	2	3	5	1	2	4	5	1	2	3	0.633883	-0.573223	5	5	4	46.83	dB(SPL)	38.86	dB(SPL)	50	s	59.09
10	4	LinnOfDeeForrest	LinnOfDeeForrest2	10_4	2023-05-28	LF	1	64	1	2	1	1	2	2	1	1	1	1	1	1	1	5	1	2	3	5	1	1	2	5	1	2	3	5	1	1	2	0.707107	-0.5	5	4	5	46.83	dB(SPL)	38.86	dB(SPL)	50	s	59.09
11	4	LinnOfDeeForrest	LinnOfDeeForrest2	11_4	2023-05-28	LF	1	22	2	1	1	2	4	2	1	1	1	1	2	1	1	5	2	4	4	4	1	2	2	5	2	4	4	4	1	2	2	0.707107	-0.207107	4	5	4	46.83	dB(SPL)	38.86	dB(SPL)	50	s	59.09
12	4	LinnOfDeeForrest	LinnOfDeeForrest2	12_4	2023-05-28	LF	1	34	1	1	1	2	4	4	1	1	1	1	2	2	1	5	1	4	2	1	1	3	2	5	1	4	2	1	1	3	2	0.56066	0.25	5	5	4	46.83	dB(SPL)	38.86	dB(SPL)	50	s	59.09
13	4	LinnOfDeeForrest	LinnOfDeeForrest2	13_4	2023-05-28	LF	2	26	1	1	1	2	4	4	1	1	1	1	2	2	1	5	2	4	2	4	1	4	2	5	2	4	2	4	1	4	2	0.707107	0.207107	4	4	4	46.83	dB(SPL)	38.86	dB(SPL)	50	s	59.09
14	4	LinnOfDeeForrest	LinnOfDeeForrest2	14_4	2023-05-28	LF	1	28	1	1	1	2	5	3	2	1	1	1	2	2	1	5	1	2	4	5	1	2	2	5	1	2	4	5	1	2	2	0.707107	-0.5	5	5	4	46.83	dB(SPL)	38.86	dB(SPL)	50	s	59.09
15	4	LinnOfDeeForrest	LinnOfDeeForrest2	15_4	2023-05-28	LF	2	40	2	1	1	2	3	4	1	1	1	1	2	2	1	5	1	2	3	5	1	3	3	5	1	2	3	5	1	3	3	0.633883	-0.366117	4	4	4	46.83	dB(SPL)	38.86	dB(SPL)	50	s	59.09
16	4	LinnOfDeeForrest	LinnOfDeeForrest2	16_4	2023-05-28	LF	1	36	1	1	1	2	4	3	2	1	1	1	2	2	1	5	2	2	3	5	1	3	4	5	2	2	3	5	1	3	4	0.487437	-0.366117	4	4	5	46.83	dB(SPL)	38.86	dB(SPL)	50	s	59.09
17	4	LinnOfDeeForrest	LinnOfDeeForrest2	17_4	2023-05-28	LF	1	40	2	1	1	2	4	4	2	1	1	1	2	2	1	5	1	3	3	5	1	4	3	5	1	3	3	5	1	4	3	0.707107	-0.18934	4	4	4	46.83	dB(SPL)	38.86	dB(SPL)	50	s	59.09
18	4	LinnOfDeeForrest	LinnOfDeeForrest2	18_4	2023-05-28	LF	1	54	2	1	1	2	1	1	2	1	1	1	1	1	1	5	2	3	3	5	1	2	1	5	2	3	3	5	1	2	1	0.78033	-0.176777	4	5	5	46.83	dB(SPL)	38.86	dB(SPL)	50	s	59.09
19	4	LinnOfDeeForrest	LinnOfDeeForrest2	19_4	2023-05-28	LF	1	49	2	1	1	1	5	2	2	1	1	1	2	1	1	5	1	2	1	5	1	1	3	5	1	2	1	5	1	1	3	0.633883	-0.366117	5	5	5	46.83	dB(SPL)	38.86	dB(SPL)	50	s	59.09
20	4	LinnOfDeeForrest	LinnOfDeeForrest2	20_4	2023-05-28	LF	2	37	1	2	1	3	4	4	1	1	1	2	2	2	1	4	1	2	2	5	1	2	4	4	1	2	2	5	1	2	4	0.457107	-0.43934	3	3	4	46.83	dB(SPL)	38.86	dB(SPL)	50	s	59.09
21	4	LinnOfDeeForrest	LinnOfDeeForrest2	21_4	2023-05-28	LF	1	25	1	1	1					1	1	2	2	2	2																	0	0	5	5	5	46.83	dB(SPL)	38.86	dB(SPL)	50	s	59.09
22	4	LinnOfDeeForrest	LinnOfDeeForrest2	22_4	2023-05-28	LF	1	30	2	1	1		5	4	2	1	1	2	2	2	1	4	1	3	2	5	1	4	2	4	1	3	2	5	1	4	2	0.676777	-0.0125631	4	4	4	46.83	dB(SPL)	38.86	dB(SPL)	50	s	59.09
23	4	LinnOfDeeForrest	LinnOfDeeForrest2	23_4	2023-05-28	LF	2	65	1	1	1	1	2	3	1	1	1	1	1	2	1	5	1	4	2	5	1	2	2	5	1	4	2	5	1	2	2	0.853553	-0.146447	4	5	5	46.83	dB(SPL)	38.86	dB(SPL)	50	s	59.09
24	4	LinnOfDeeForrest	LinnOfDeeForrest2	24_4	2023-05-28	LF	2	24	2	1	1	1	5	4	1	1	1	1	2	2	1	5	1	3	3	5	1	4	2	5	1	3	3	5	1	4	2	0.78033	-0.116117	5	5	5	46.83	dB(SPL)	38.86	dB(SPL)	50	s	59.09
25	4	LinnOfDeeForrest	LinnOfDeeForrest2	25_4	2023-05-28	LF	2	52	1	1	1	2	3	3	2	1	1	1	2	2	1	5	1	4	2	5	1	3	1	5	1	4	2	5	1	3	1	0.926777	0.0303301	5	5	5	46.83	dB(SPL)	38.86	dB(SPL)	50	s	59.09
1	2	SerpentinaBaitaSegantini	SerpentinaBaitaSegantini1	1_2	2022-06-19	SBS	1	28	1	2	1	2	3	3	3	1	1	1	2	2	2	4	1	3	4	5	1	3	2	4	1	3	4	5	1	3	2	0.676777	-0.323223	5	4	5
2	2	SerpentinaBaitaSegantini	SerpentinaBaitaSegantini1	2_2	2022-06-19	SBS	1	55	1	1	1	1	3	3	4	1	1	1	2	2	2	5	1	4	4	4	1	4	1	5	1	4	4	4	1	4	1	0.853553	0	5	5	5
3	2	SerpentinaBaitaSegantini	SerpentinaBaitaSegantini1	3_2	2022-06-19	SBS	2	56	2	2	1	1	3	2	3	1	1	1	2	1	2	5	1	3	4	5	1	3	1	5	1	3	4	5	1	3	1	0.853553	-0.25	5	5	5
4	2	SerpentinaBaitaSegantini	SerpentinaBaitaSegantini1	4_2	2022-06-19	SBS	1	34	1	1	1	1	4	3	4	1	1	1	2	2	2	5	1	5	5	5	1	2	1	5	1	5	5	5	1	2	1	1	-0.31066	5	5	5
5	2	SerpentinaBaitaSegantini	SerpentinaBaitaSegantini1	5_2	2022-06-19	SBS	1	23	1	1	1	2	3	4	3	1	1	1	2	2	2	5	1	5	2	5	1	4	1	5	1	5	2	5	1	4	1	1	0.207107	5	4	5
6	2	SerpentinaBaitaSegantini	SerpentinaBaitaSegantini1	6_2	2022-06-19	SBS	2	23	1	1	1	2	1	5	1	1	1	1	1	2	1	5	1	3	5	5	1	2	1	5	1	3	5	5	1	2	1	0.853553	-0.457107	5	5	5
1	2	ParcheggioBaitaSegantini	ParcheggioBaitaSegantini1	1_2	2022-06-19	PBS1	1	28	1	3	1	2	3	4	3	2	1	1	2	2	2	4	2	3	4	4	2	3	2	4	2	3	4	4	2	3	2	0.426777	-0.176777	3	3	4
2	2	ParcheggioBaitaSegantini	ParcheggioBaitaSegantini1	2_2	2022-06-19	PBS1	1	55	1	2	1	3	3	4	4	1	1	2	2	2	2	4	1	3	3	4	1	3	1	4	1	3	3	4	1	3	1	0.676777	-0.0732233	5	4	4
3	2	ParcheggioBaitaSegantini	ParcheggioBaitaSegantini1	3_2	2022-06-19	PBS1	2	56	2	1	1	1	2	4	3	1	1	1	1	2	2	5	2	3	4	4	2	3	2	5	2	3	4	4	2	3	2	0.53033	-0.176777	5	4	5
4	2	ParcheggioBaitaSegantini	ParcheggioBaitaSegantini1	4_2	2022-06-19	PBS1	1	34	1	2	1	2	3	4	4	1	1	1	2	2	2	5	2	5	4	4	2	3	2	5	2	5	4	4	2	3	2	0.676777	-0.0303301	5	4	5
5	2	ParcheggioBaitaSegantini	ParcheggioBaitaSegantini1	5_2	2022-06-19	PBS1	1	23	1	4	2	4	2	5	4	2	1	2	1	2	2	3	4	4	4	3	3	2	3	3	4	4	4	3	3	2	3	0	-0.0606602	3	2	3
6	2	ParcheggioBaitaSegantini	ParcheggioBaitaSegantini1	6_2	2022-06-19	PBS1	2	23	1	2	1	4	1	5	5	1	1	2	1	2	2	3	3	4	2	2	2	4	2	3	3	4	2	2	2	4	2	0.176777	0.426777	4	3	4
1	2	MalgaJuribello	MalgaJuribello1	1_2	2022-06-19	MJ	1	28	1	1	3	4	4	2	3	1	2	2	2	1	2	2	5	4	2	1	4	4	2	2	5	4	2	1	4	4	2	-0.353553	0.646447	2	3	4
2	2	MalgaJuribello	MalgaJuribello1	2_2	2022-06-19	MJ	1	55	1	1	1	3	4	3	2	1	1	2	2	2	1	5	1	4	4	0	1	4	1	5	1	4	4	0	1	4	1	0.56066	0.292893	5	4	4
3	2	MalgaJuribello	MalgaJuribello1	3_2	2022-06-19	MJ	2	56	2	1	1	3	5	3	2	1	1	2	2	2	1	2	5	4	1	1	4	5	1	2	5	4	1	1	4	5	1	-0.28033	0.926777	3	3	4
4	2	MalgaJuribello	MalgaJuribello1	4_2	2022-06-19	MJ	1	34	1	1	1	4	4	4	2	1	1	2	2	2	1	4	3	4	2	2	2	4	2	4	3	4	2	2	2	4	2	0.28033	0.426777	4	4	5
5	2	MalgaJuribello	MalgaJuribello1	5_2	2022-06-19	MJ	1	23	1	1	2	4	5	4	3	1	1	2	2	2	2	4	4	3	2	2	2	4	2	4	4	3	2	2	2	4	2	0.133883	0.426777	4	3	4
6	2	MalgaJuribello	MalgaJuribello1	6_2	2022-06-19	MJ	2	23	1	1	1	4	5	3	4	1	1	2	2	2	2	5	2	5	2	2	1	5	1	5	2	5	2	2	1	5	1	0.707107	0.603553	5	5	5
1	3	RifuggioCapannaCervino	RifuggioCapannaCervino1	1_3	2023-02-12	RCC	1	34	1	2	2	4	1	2	1	1	1	2	1	1	1	4	3	2	4	4	2	3	2	4	3	2	4	4	2	3	2	0.28033	-0.176777	4	2	5
2	3	RifuggioCapannaCervino	RifuggioCapannaCervino1	2_3	2023-02-12	RCC	4		2	4	2	5	1	1	5	2	1	2	1	1	2	4	2	3	3	2	2	4	2	4	2	3	3	2	2	4	2	0.28033	0.176777	4	4	4
3	3	RifuggioCapannaCervino	RifuggioCapannaCervino1	3_3	2023-02-12	RCC	1	33	1	2	1	5	1	2	1	1	1	2	1	1	1	2	4	3	4	2	4	2	4	2	4	3	4	2	4	2	4	-0.426777	-0.133883	2	2	4
4	3	RifuggioCapannaCervino	RifuggioCapannaCervino1	4_3	2023-02-12	RCC	1	29	1	1	1	4	1	2	1	1	1	2	1	1	1	3	2	1	2	2	4	4	4	3	2	1	2	2	4	4	4	-0.323223	-0.0125631	3	4	3
5	3	RifuggioCapannaCervino	RifuggioCapannaCervino1	5_3	2023-02-12	RCC	1	32	1	1	2	4	1	2	2	1	1	2	1	1	1	3	3	3	2	3	2	2	2	3	3	3	2	3	2	2	2	0.176777	0.0732233	3	3	5
6	3	RifuggioCapannaCervino	RifuggioCapannaCervino1	6_3	2023-02-12	RCC	1	25	1	1	2	4	1	1	1	1	1	2	1	1	1	3	3	4	3	2	3	4	1	3	3	4	3	2	3	4	1	0.146447	0.396447	3	4	4
7	3	RifuggioCapannaCervino	RifuggioCapannaCervino1	7_3	2023-02-12	RCC	2	26	1	2	1	5	1	1	1	1	1	2	1	1	1	3	3	3	3	3	3	3	2	3	3	3	3	3	3	3	2	0.0732233	0.0732233	3	3	4
8	3	RifuggioCapannaCervino	RifuggioCapannaCervino1	8_3	2023-02-12	RCC	1	55	2	1	1	3	1	1	1	1	1	2	1	1	1	4	1	4	3	4	1	4	2	4	1	4	3	4	1	4	2	0.676777	0.0303301	4	5	5
9	3	RifuggioCapannaCervino	RifuggioCapannaCervino1	9_3	2023-02-12	RCC	2	20	2	1	3	4	1	2	1	1	2	2	1	1	1	4	2	4	4	4	2	3	2	4	2	4	4	4	2	3	2	0.5	-0.103553	3	4	4
10	3	RifuggioCapannaCervino	RifuggioCapannaCervino1	10_3	2023-02-12	RCC	2	26	1	1	1	5	1	1	2	1	1	2	1	1	1	2	2	4	2	2	4	4	1	2	2	4	2	2	4	4	1	0.0125631	0.426777	3	4	2
11	3	RifuggioCapannaCervino	RifuggioCapannaCervino1	11_3	2023-02-12	RCC	1	30	1	1	1	5	1	1	1	1	1	2	1	1	1	2	3	1	4	4	2	2	4	2	3	1	4	4	2	2	4	-0.146447	-0.5	3	2	4
12	3	RifuggioCapannaCervino	RifuggioCapannaCervino1	12_3	2023-02-12	RCC	1	39	1	1	2	5	1	2	1	1	1	2	1	1	1	3	4	3	2	2	3	4	3	3	4	3	2	2	3	4	3	-0.146447	0.353553	3	2	4
13	3	RifuggioCapannaCervino	RifuggioCapannaCervino1	13_3	2023-02-12	RCC	2	51	2	1	2	3	1	1	1	1	1	2	1	1	1	3	2	2	3	3	2	4	4	3	2	2	3	3	2	4	4	0.0303301	-0.116117	3	3	5
14	3	RifuggioCapannaCervino	RifuggioCapannaCervino1	14_3	2023-02-12	RCC	1	28	1	1	1	5	1	3	1	1	1	2	1	2	1	2	4	4	1	2	4	4	2	2	4	4	1	2	4	4	2	-0.207107	0.603553	2	5	5
15	3	RifuggioCapannaCervino	RifuggioCapannaCervino1	15_3	2023-02-12	RCC	2	25	1	2	2	5	1	2	2	1	1	2	1	1	1	4	5	2	2	2	4	5	1	4	5	2	2	2	4	5	1	-0.146447	0.603553	2	2	4
16	3	RifuggioCapannaCervino	RifuggioCapannaCervino1	16_3	2023-02-12	RCC	2	24	1	2	1	5	1	1	4	1	1	2	1	1	2	3	3	4	2	2	2	4	2	3	3	4	2	2	2	4	2	0.176777	0.426777	3	3	5
17	3	RifuggioCapannaCervino	RifuggioCapannaCervino1	17_3	2023-02-12	RCC	1	35	1	1	2	4	1	2	1	1	1	2	1	1	1	4	2	3	3	4	3	3	3	4	2	3	3	4	3	3	3	0.25	-0.146447	3	2	5
18	3	RifuggioCapannaCervino	RifuggioCapannaCervino1	18_3	2023-02-12	RCC	2	36	1	2	1	4	1	2	1	1	1	2	1	1	1	5	2	5	2	4	1	4	1	5	2	5	2	4	1	4	1	0.853553	0.353553	4	4	5
1	3	BaitaSegantini	BaitaSegantini1	1_3	2023-02-12	SGT	1	34	1	1	1	3	3	2	1	1	1	2	2	1	1	5	2	3	3	4	1	3	2	5	2	3	3	4	1	3	2	0.633883	-0.0732233	4	2	4
2	3	BaitaSegantini	BaitaSegantini1	2_3	2023-02-12	SGT	4		2	3	1	5	4	2	1	2	1	2	2	1	1	5	2	3	3	4	2	4	2	5	2	3	3	4	2	4	2	0.53033	0.0303301	4	5	4
3	3	BaitaSegantini	BaitaSegantini1	3_3	2023-02-12	SGT	1	33	1	2	1	4	3	3	1	1	1	2	2	2	1	4	2	3	4	4	2	2	2	4	2	3	4	4	2	2	2	0.426777	-0.28033	4	3	5
4	3	BaitaSegantini	BaitaSegantini1	4_3	2023-02-12	SGT	1	29	1	1	1	3	3	3	1	1	1	2	2	2	1	3	1	2	2	3	3	4	2	3	1	2	2	3	3	4	2	0.146447	0.0606602	4	4	4
5	3	BaitaSegantini	BaitaSegantini1	5_3	2023-02-12	SGT	1	32	1	2	1	3	2	2	1	1	1	2	1	1	1	5	2	4	4	4	2	2	2	5	2	4	4	4	2	2	2	0.603553	-0.207107	4	4	5
6	3	BaitaSegantini	BaitaSegantini1	6_3	2023-02-12	SGT	1	25	1	2	1	3	2	2	1	1	1	2	1	1	1	5	2	3	4	4	1	2	2	5	2	3	4	4	1	2	2	0.633883	-0.28033	4	4	5
7	3	BaitaSegantini	BaitaSegantini1	7_3	2023-02-12	SGT	2	26	1	2	1	5	2	2	1	1	1	2	1	1	1	4	3	3	3	3	2	2	3	4	3	3	3	3	2	2	3	0.207107	-0.103553	3	3	5
8	3	BaitaSegantini	BaitaSegantini1	8_3	2023-02-12	SGT	1	55	2	2	1	3	3	2	1	1	1	2	2	1	1	5	1	5	3	4	1	4	1	5	1	5	3	4	1	4	1	0.926777	0.176777	5	5	5
9	3	BaitaSegantini	BaitaSegantini1	9_3	2023-02-12	SGT	2	20	2	3	1	4	3	2	1	2	1	2	2	1	1	5	2	3	2	4	2	4	2	5	2	3	2	4	2	4	2	0.53033	0.133883	4	4	5
10	3	BaitaSegantini	BaitaSegantini1	10_3	2023-02-12	SGT	2	26	1	2	1	3	2	1	1	1	1	2	1	1	1	5	2	3	2	5	1	4	1	5	2	3	2	5	1	4	1	0.78033	0.133883	5	5	5
11	3	BaitaSegantini	BaitaSegantini1	11_3	2023-02-12	SGT	1	30	1	1	1	3	2	2	1	1	1	2	1	1	1	4	2	1	5	4	2	2	1	4	2	1	5	4	2	2	1	0.353553	-0.457107	4	4	5
12	3	BaitaSegantini	BaitaSegantini1	12_3	2023-02-12	SGT	1	39	1	1	1	3	2	2	1	1	1	2	1	1	1	4	2	3	4	4	2	2	3	4	2	3	4	4	2	2	3	0.353553	-0.353553	4	4	5
13	3	BaitaSegantini	BaitaSegantini1	13_3	2023-02-12	SGT	2	51	2	2	1	2	2	1	1	1	1	1	1	1	1	4	2	3	4	4	2	3	2	4	2	3	4	4	2	3	2	0.426777	-0.176777	4	4	5
14	3	BaitaSegantini	BaitaSegantini1	14_3	2023-02-12	SGT	1	28	1	1	1	2	2	3	1	1	1	1	1	2	1	5	1	1	4	5	1	1	2	5	1	1	4	5	1	1	2	0.633883	-0.676777	4	5	5
15	3	BaitaSegantini	BaitaSegantini1	15_3	2023-02-12	SGT	2	25	1	2	1	5	2	4	1	1	1	2	1	2	1	4	2	4	3	4	1	3	1	4	2	4	3	4	1	3	1	0.676777	0.0732233	4	3	5
16	3	BaitaSegantini	BaitaSegantini1	16_3	2023-02-12	SGT	2	24	1	2	1	4	3	1	1	1	1	2	2	1	1	5	2	3	4	4	1	4	2	5	2	3	4	4	1	4	2	0.633883	-0.0732233	4	4	5
17	3	BaitaSegantini	BaitaSegantini1	17_3	2023-02-12	SGT	1	35	1	3	1	4	2	3	1	2	1	2	1	2	1	3	3	3	2	4	3	4	3	3	3	3	2	4	3	4	3	0.0732233	0.133883	4	2	5
18	3	BaitaSegantini	BaitaSegantini1	18_3	2023-02-12	SGT	2	36	1	2	1	3	4	2	1	1	1	2	2	1	1	5	1	4	5	5	1	2	2	5	1	4	5	5	1	2	2	0.853553	-0.457107	5	5	5
[truncated: 236 more columns]

## Sheet: Site_ID
Site_ID		Q1		Q2		Q3
1	Braies	1	male	18-99	age	1	often practicing mountain sports
2	ValVenegia	2	female			2	not often practicing mountain sports
3	BaitaSegantini	3	prefer to self describe
4	GlenLui	4	prefer not to say
5	TreCime

## Sheet: Demographics
Participant_ID	Site_ID	Day	Q1	Q2	Q3
1	2	2022-06-19	1	28	1
2	2	2022-06-19	1	55	1
3	2	2022-06-19	2	56	2
4	2	2022-06-19	1	34	1
5	2	2022-06-19	1	23	1
6	2	2022-06-19	2	23	1
1	1	2022-04-24	4	40	1
2	1	2022-04-24	1	26	2
3	1	2022-04-24	2	22	1
4	1	2022-04-24	1	35	2
5	1	2022-04-24	1	42	1
6	1	2022-04-24	2	22	2
7	1	2022-04-24	2	22	2
8	1	2022-04-24	1	23	1
9	1	2022-04-24	1	27	1
10	1	2022-04-24	1	19	2
11	1	2022-04-24	2	27	1
12	1	2022-04-24	2	27	2
13	1	2022-04-24	2		1
14	1	2022-04-24	2	27	2
1	3	2023-02-12	1	34	1
2	3	2023-02-12	3		2
3	3	2023-02-12	1	33	1
4	3	2023-02-12	1	29	1
5	3	2023-02-12	1	32	1
6	3	2023-02-12	1	25	1
7	3	2023-02-12	2	26	1
8	3	2023-02-12	1	55	2
9	3	2023-02-12	2	20	2
10	3	2023-02-12	2	26	1
11	3	2023-02-12	1	30	1
12	3	2023-02-12	1	39	1
13	3	2023-02-12	2	51	2
14	3	2023-02-12	1	28	1
15	3	2023-02-12	2	25	1
16	3	2023-02-12	2	24	1
17	3	2023-02-12	1	35	1
18	3	2023-02-12	2	36	1
1	4	2023-05-28	1	29	2
2	4	2023-05-28	1	46	1
3	4	2023-05-28	2	29	1
4	4	2023-05-28	2	65	2
5	4	2023-05-28	1	61	1
6	4	2023-05-28	2	28	1
7	4	2023-05-28	1	24	1
8	4	2023-05-28	2	29	2
9	4	2023-05-28	1	36	1
10	4	2023-05-28	1	64	1
11	4	2023-05-28	1	22	2
12	4	2023-05-28	1	34	1
13	4	2023-05-28	2	26	1
14	4	2023-05-28	1	28	1
15	4	2023-05-28	2	40	2
16	4	2023-05-28	1	36	1
17	4	2023-05-28	1	40	2
18	4	2023-05-28	1	54	2
19	4	2023-05-28	1	49	2
20	4	2023-05-28	2	37	1
21	4	2023-05-28	1	25	1
22	4	2023-05-28	1	30	2
23	4	2023-05-28	2	65	1
24	4	2023-05-28	2	24	2
25	4	2023-05-28	2	52	1
1	5	2023-06-25	4	28	2
2	5	2023-06-25	1	24	1
3	5	2023-06-25	2	46	2
4	5	2023-06-25	1	55	1
5	5	2023-06-25	2	51	2
6	5	2023-06-25	2	32	1
7	5	2023-06-25	2		1
8	5	2023-06-25	1	32	1
9	5	2023-06-25	1	30	1
10	5	2023-06-25	2	22	1
11	5	2023-06-25	1		1
12	5	2023-06-25	2	28	1
13	5	2023-06-25	2	28	1
14	5	2023-06-25	2	27	1
15	5	2023-06-25	1	29	1
16	5	2023-06-25	2	58	1
17	5	2023-06-25	1	29	1
18	5	2023-06-25	2	25	1
19	5	2023-06-25	2	65	1
20	5	2023-06-25	1	77	1
21	5	2023-06-25	1	33	1
22	5	2023-06-25	2	23	2
23	5	2023-06-25	1	56	2
24	5	2023-06-25	2	34	2
25	5	2023-06-25	2	57	2
